# Supplementary material for: Prioritizing quantitative trait loci for root system architecture in tetraploid wheat
Source: PubMed Central journal article supplement (PMC4753857; doi:10.1093/jxb/erw039), 2016-02-13
Supplement: supp_erw039_Supplementary_figures_S1_S4.pdf [file supp_erw039_Supplementary_figures_S1_S4.pdf]

**Title: Prioritizing QTLs for root system architecture in tetraploid wheat  
Supplementary Figure S1-S4.**

Authors: Marco Maccaferri<sup>\*,1</sup>, Walid El-Feki<sup>1,2</sup>, Nazemi Ghasemali<sup>1,3</sup>, Silvio Salvi<sup>1</sup>, Maria Angela Canè M<sup>1</sup>, Chiara Colalongo<sup>1</sup>, Sandra Stefanelli<sup>1</sup>, Roberto Tuberosa<sup>1</sup>

<sup>1</sup>Department of Agricultural Sciences, University of Bologna, 40127 Bologna, Italy

<sup>2</sup>Department of Crop Sciences, Faculty of Agriculture, Alexandria University, 23714 Alexandria, Egypt

<sup>3</sup>Department of Agriculture, Hajiabad Branch, Islamic Azad University, 21100 Hajiabad, Iran

\* To whom correspondence should be addressed: marco.maccaferri@unibo.it

**Supplementary Figure 1. frequency distribution of root seminal architecture (RSA) traits measured in the recombinant inbred populations Colosseo×Lloyd and Meridiano×Claudio.**

Distributions are reported for the most relevant RSA traits.

List of RSA acronyms:

**Root seminal architecture traits**

TRN, total root number

Rt6, presence of the 6<sup>th</sup> asymmetric seminal root

PRL, primary root length

TRL, total root length

ARL, average root length

LRN, lateral root number

RGA, root growth angle

SL, shoot length

SDW, shoot dry weight

RDW, root dry weight

RSR, root to shoot ratio

iTGW, thousand grain weight of seeds used in the RSA experiment

**Field traits**

GY, grain yield

TGW, thousand grain weight in field trials

### 1A ) Colosseo x Lloyd mapping population

↓ Colosseo

↓ Lloyd

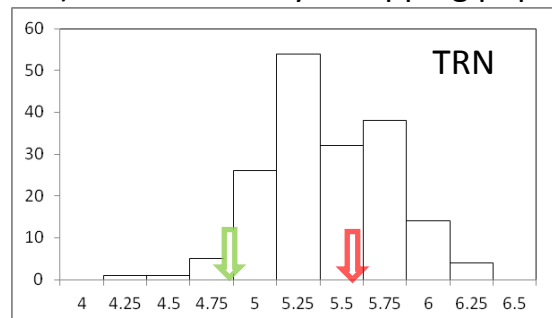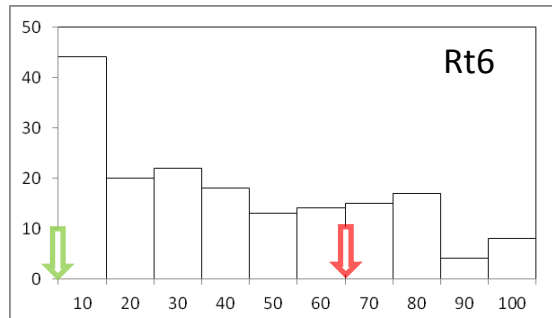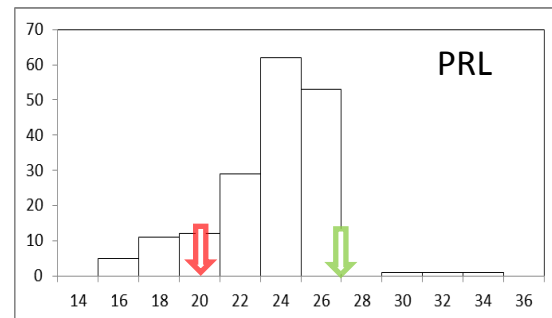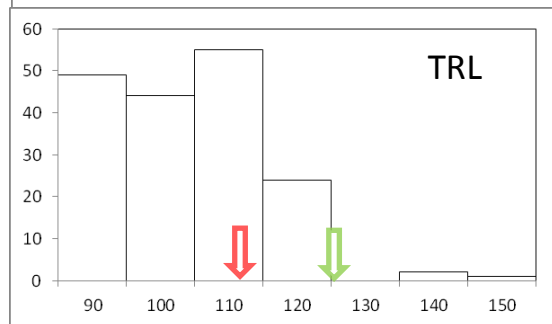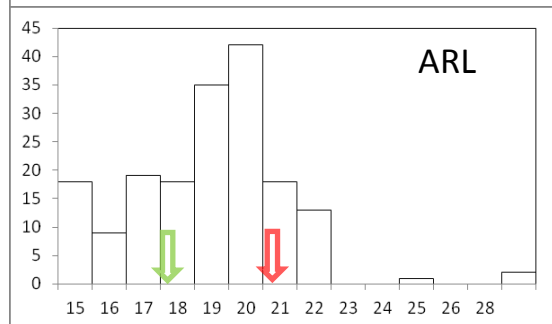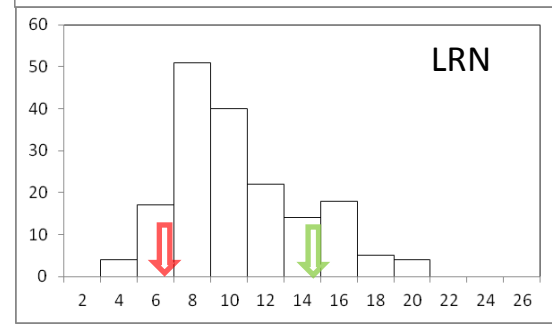

### 1B ) Meridiano x Claudio mapping population

↓ Meridiano

↓ Claudio

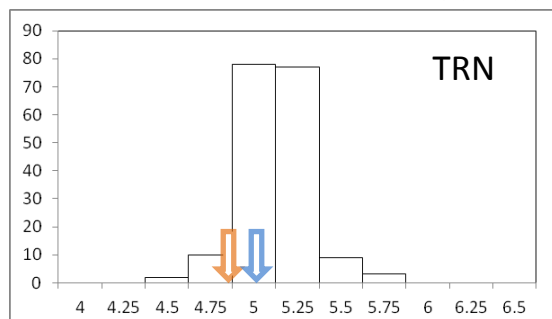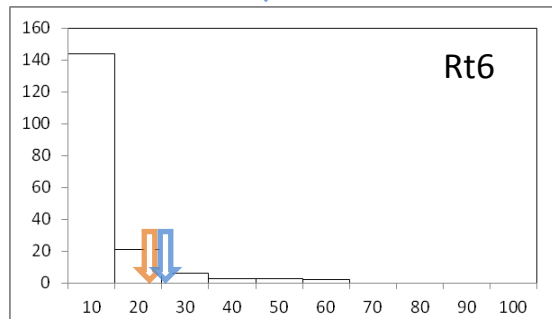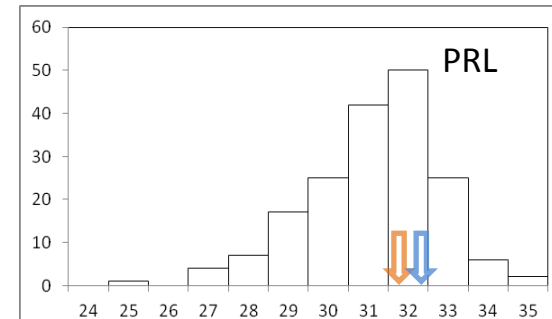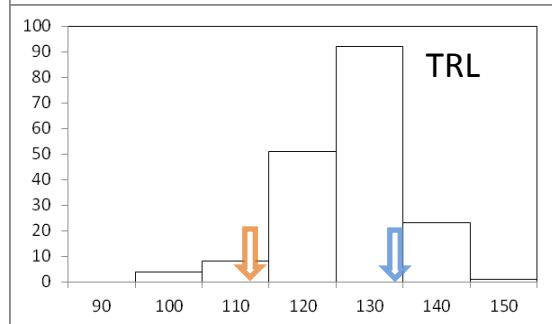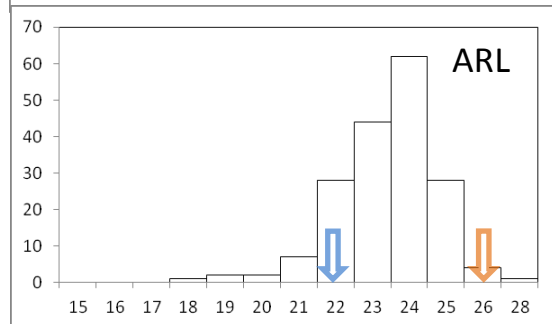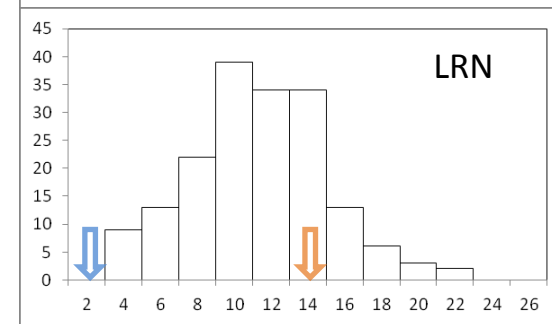

## 2A ) Colosseo x Lloyd mapping population

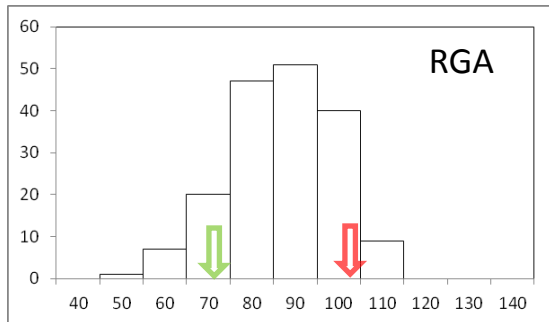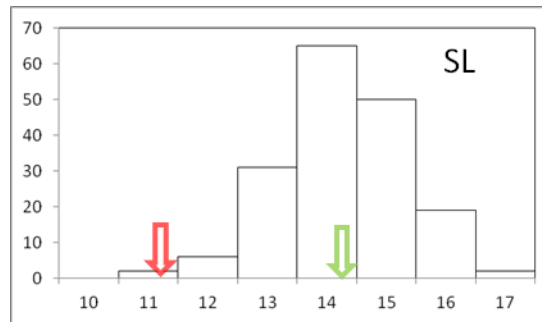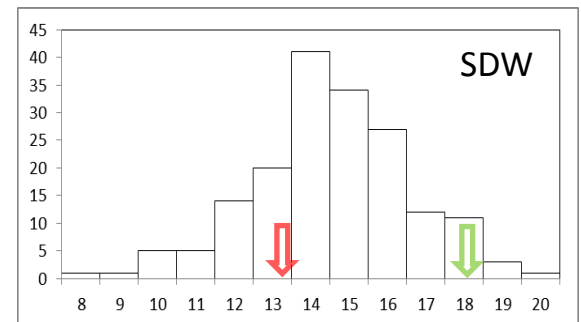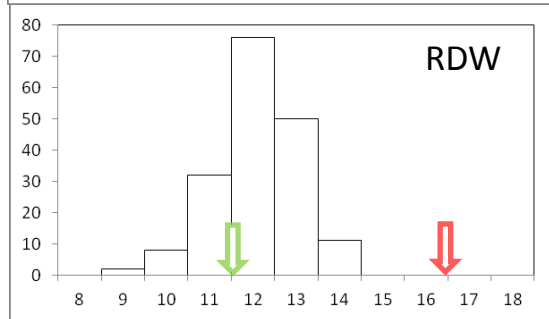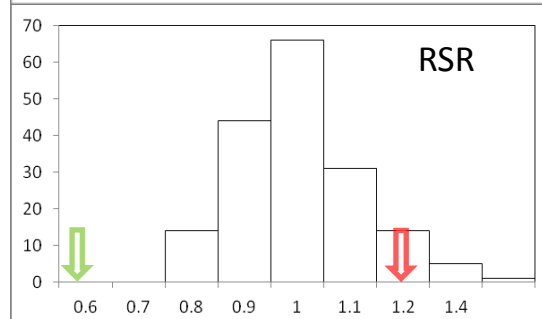

↓ Colosseo

↓ Lloyd

## 2B ) Meridiano x Claudio mapping population

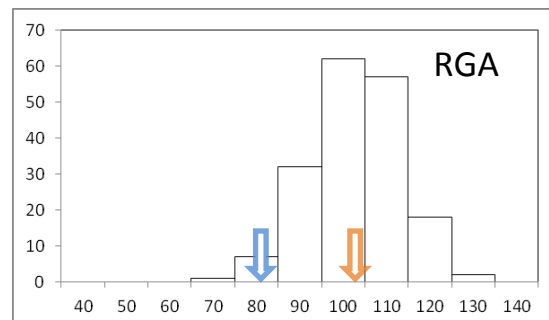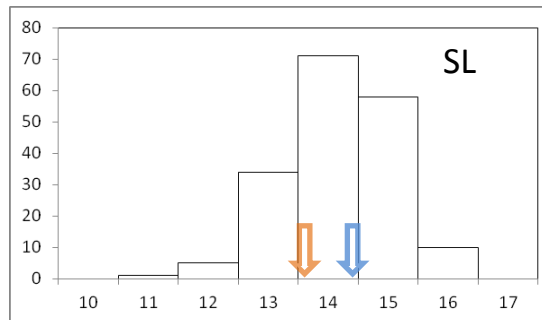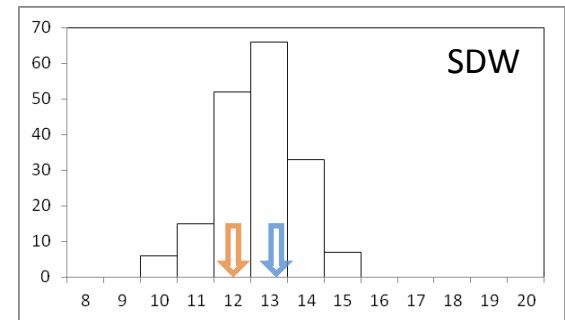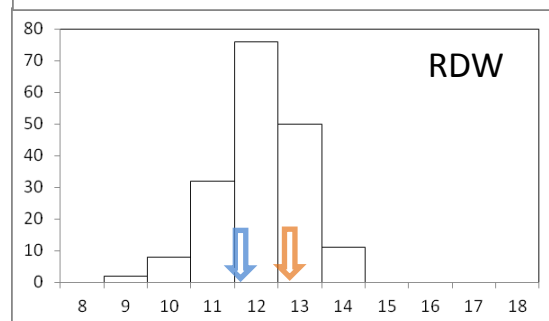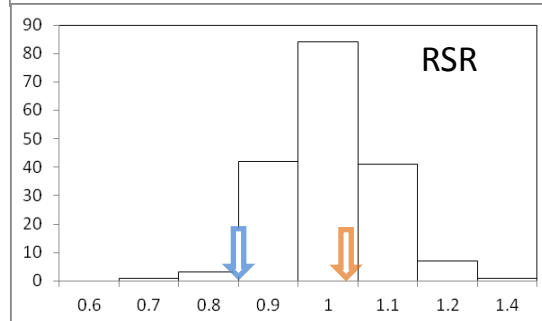

↓ Meridiano

↓ Claudio

## **Supplementary Figure S2. Schematic representation of root system architecture (RSA) QTLs in tetraploid wheat projected onto an SNP-based tetraploid consensus map.**

Root system architecture (RSA) QTLs from two durum wheat mapping population, the association mapping panel (Durum Panel, DP) and RSA QTLs from previously published studies in wheat are projected.

The consensus tetraploid wheat map has been published in Maccaferri *et al.* (2015).

**QTLs from Colosseo × Lloyd (CxL) and Meridiano × Claudio (MxC)** are reported on the left of chromosome bars while association mapping QTLs (AM-QTLs) are reported on the right. QTLs for root length and number are reported as blue-filled bars, seminal root angle (RGA) QTLs are reported in orange, shoot-related QTLs in green, grain weight (GWT) QTLs in red.

**QTLs from RIL populations** with  $R^2 < 10\%$  are reported as thin half-tone coloured bars, while QTLs with  $R^2 > 10\%$  are reported as tick full-tone bars.

The parental allele with a positive associated effect is reported as round-bracketing using the acronyms: **Co**, Colosseo; **Ld**, Lloyd; **Me**, Meridiano; **Cl**, Claudio.

**QTLs from association mapping (GWAS-QTLs, reported as DP QTLs)** have been reported together with their significance level: \*\*, marker-wise significance  $P < 0.01$  ( $-\text{LOG}P=2$ ); \*\*\*, marker-wise significance,  $P < 0.001$  ( $-\text{LOG}P=3$ ); \*\*\*\*, experiment-wise significance,  $P < 0.05$  ( $-\text{LOG}P=4$ ).

**root system architecture (RSA) QTLs** from previously published studies in wheat have been projected on the consensus map and reported as black-filled confidence interval bars. QTL references are reported as round-bracketed alpha-numeric acronyms using **Tt** for *Triticum turgidum* QTLs and **Ta** for *Triticum aestivum* QTLs.

**Syntenic intervals of rice deep rooting and root growth angle QTLs** have been projected and reported on the extreme-right of chromosome bars as orange-filled bars using the **Os** acronym.

**Major RSA QTL-clusters** based on concomitant co-location of RSA QTL confidence intervals from multiple wheat mapping stocks are reported as grey-banded intervals.

**RSA trait acronyms:** TRN, Total root number; R6th, Presence of the 6th asymmetric seminal root; PRL, primary root length; TRL, total root length; ARL, average root length; LRN, lateral root number; RGA, root growth angle; RDW, root dry weight; SDW, shoot dry weight; SL, shoot length; RSR, root-to-shoot ratio; RS, root surface; RD, root diameter; RV, root volume; GY, grain yield; iTGW, initial thousand grain weight of seeds used in the RSA experiment; TGW, thousand grain weight in field trials

## References for projected root system architecture QTLs from previous studies in wheat

| Code | Reference                                                 | Population                 | Species               |
|------|-----------------------------------------------------------|----------------------------|-----------------------|
| Tt1  | Petrarulo et al. (2015) Mol Genet Genomics 290:785-806.   | Creso x Pedroso            | Tetraploid wheat (Tt) |
| Ta2  | Cao et al. (2014)                                         | Xiaoyan 54 x Jing 411      | Hexaploid wheat (Ta)  |
| Ta3  | Christopher et al. (2013) Theor Appl Genet 126:1563-1574. | Seri x Hartog              | Hexaploid wheat (Ta)  |
| Ta4  | Atkinson et al. (2015) J Exp Bot 66:2283-2292.            | Savannah x Rialto          | Hexaploid wheat (Ta)  |
| Ta5  | Bai et al. (2013) J Exp Bot 64:1745-1753.                 | Avalon x cadenza           | Hexaploid wheat (Ta)  |
| Ta6  | Liu et al. (2013) Euphytica 189:51-                       | Hanxuan 10 and Lumai 14    | Hexaploid wheat (Ta)  |
| Ta7  | Guo et al. (2012)                                         | Chuan 35050 x Shannong 483 | Hexaploid wheat (Ta)  |
| Ta8  | Hamada et al. (2012)                                      | U24 x AyahiKari            | Hexaploid wheat (Ta)  |
| Ta9  | Ren et al. (2012)                                         | Xiaoyan 54 x Jing 411      | Hexaploid wheat (Ta)  |
| Ta10 | Laperche et al. (2006) Theor Appl Genet 113:1131-1146.    | Arche x Recital            | Hexaploid wheat (Ta)  |
| Tt11 | Kubo et al. (2007)                                        | Jennah Khetifa x Cham1     | Tetraploid wheat (Ta) |
| Ta12 | An et al. (2006)                                          | Hanxuan 10 x Lumai 14      | Hexaploid wheat (Tt)  |

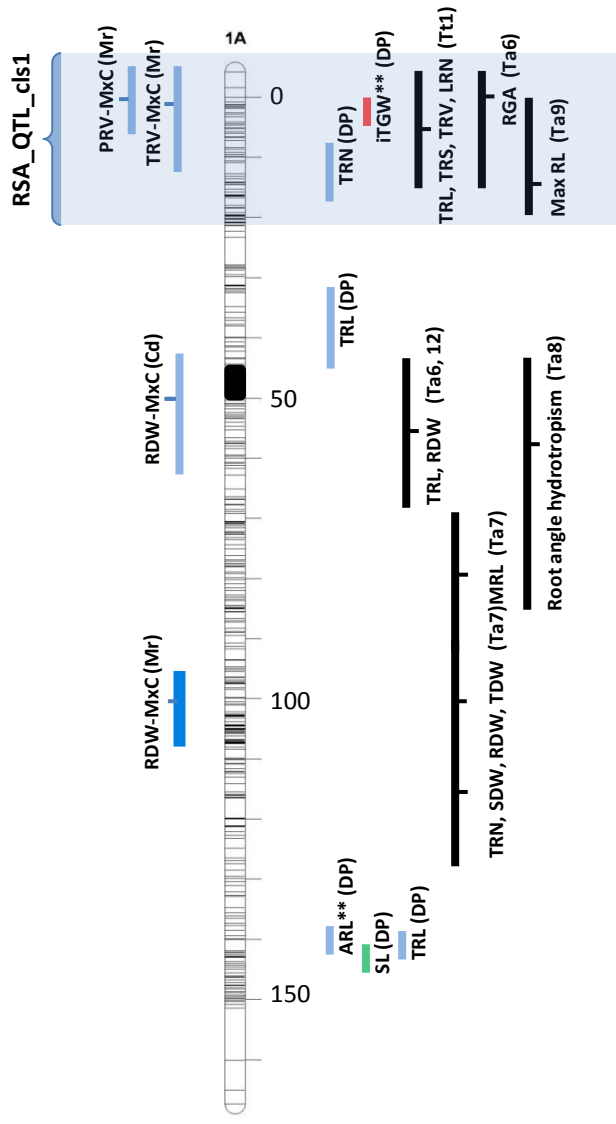

## Linkage mapping

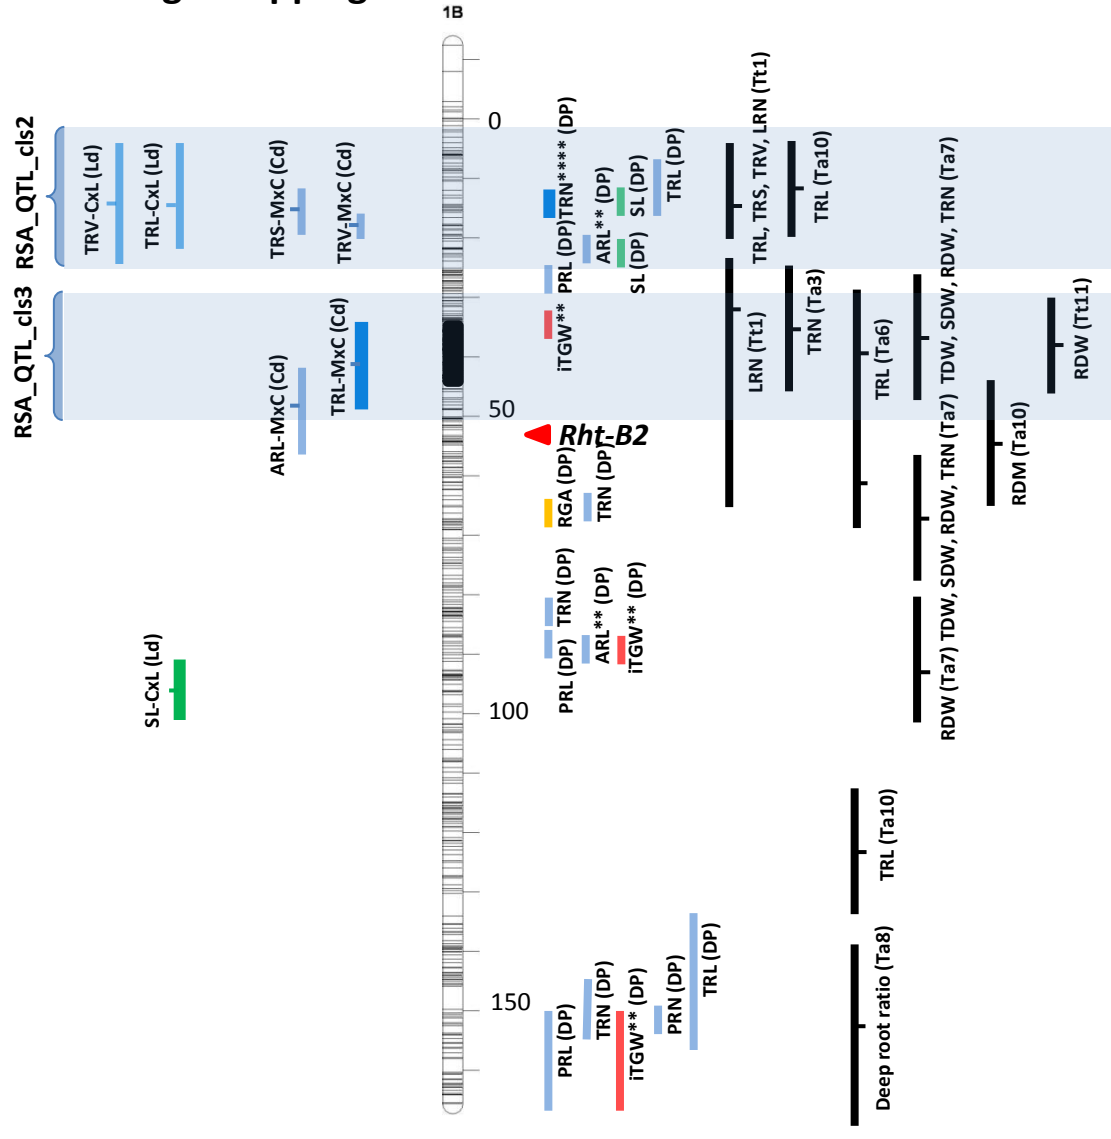

## GWAS

## Bread wheat

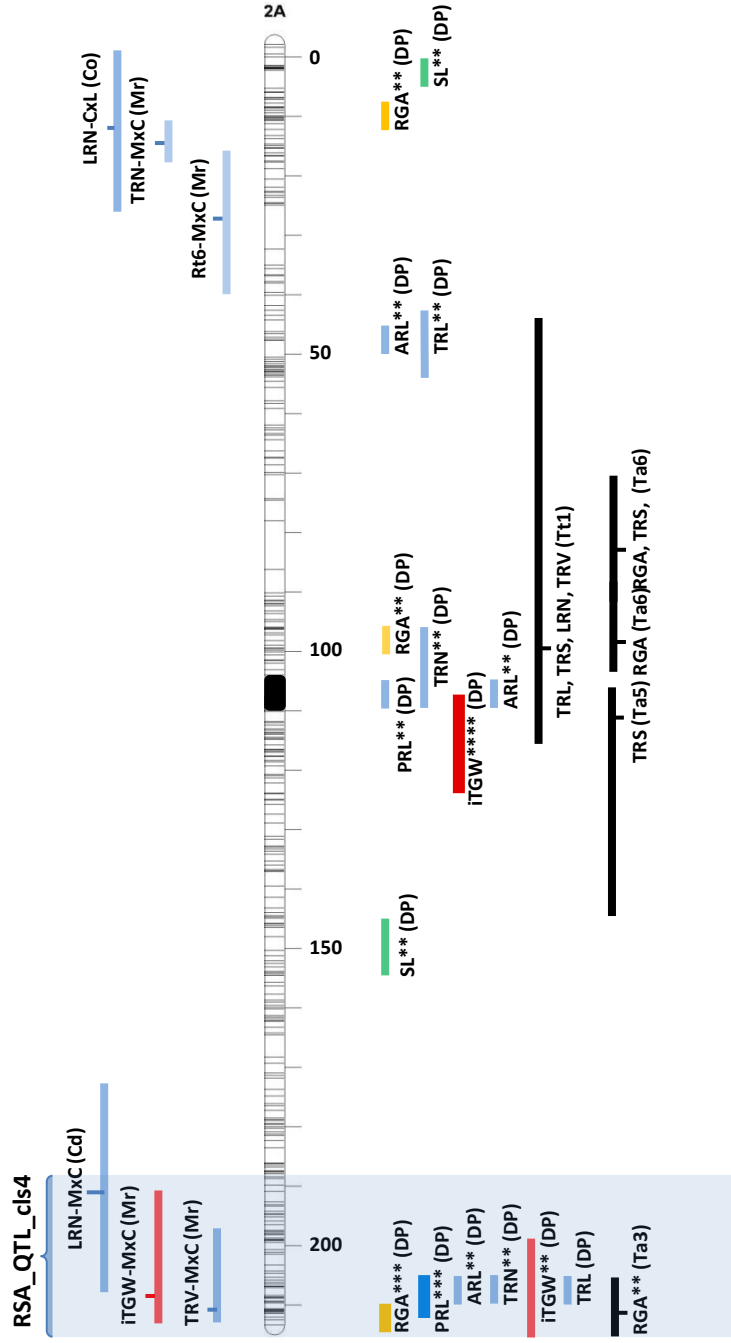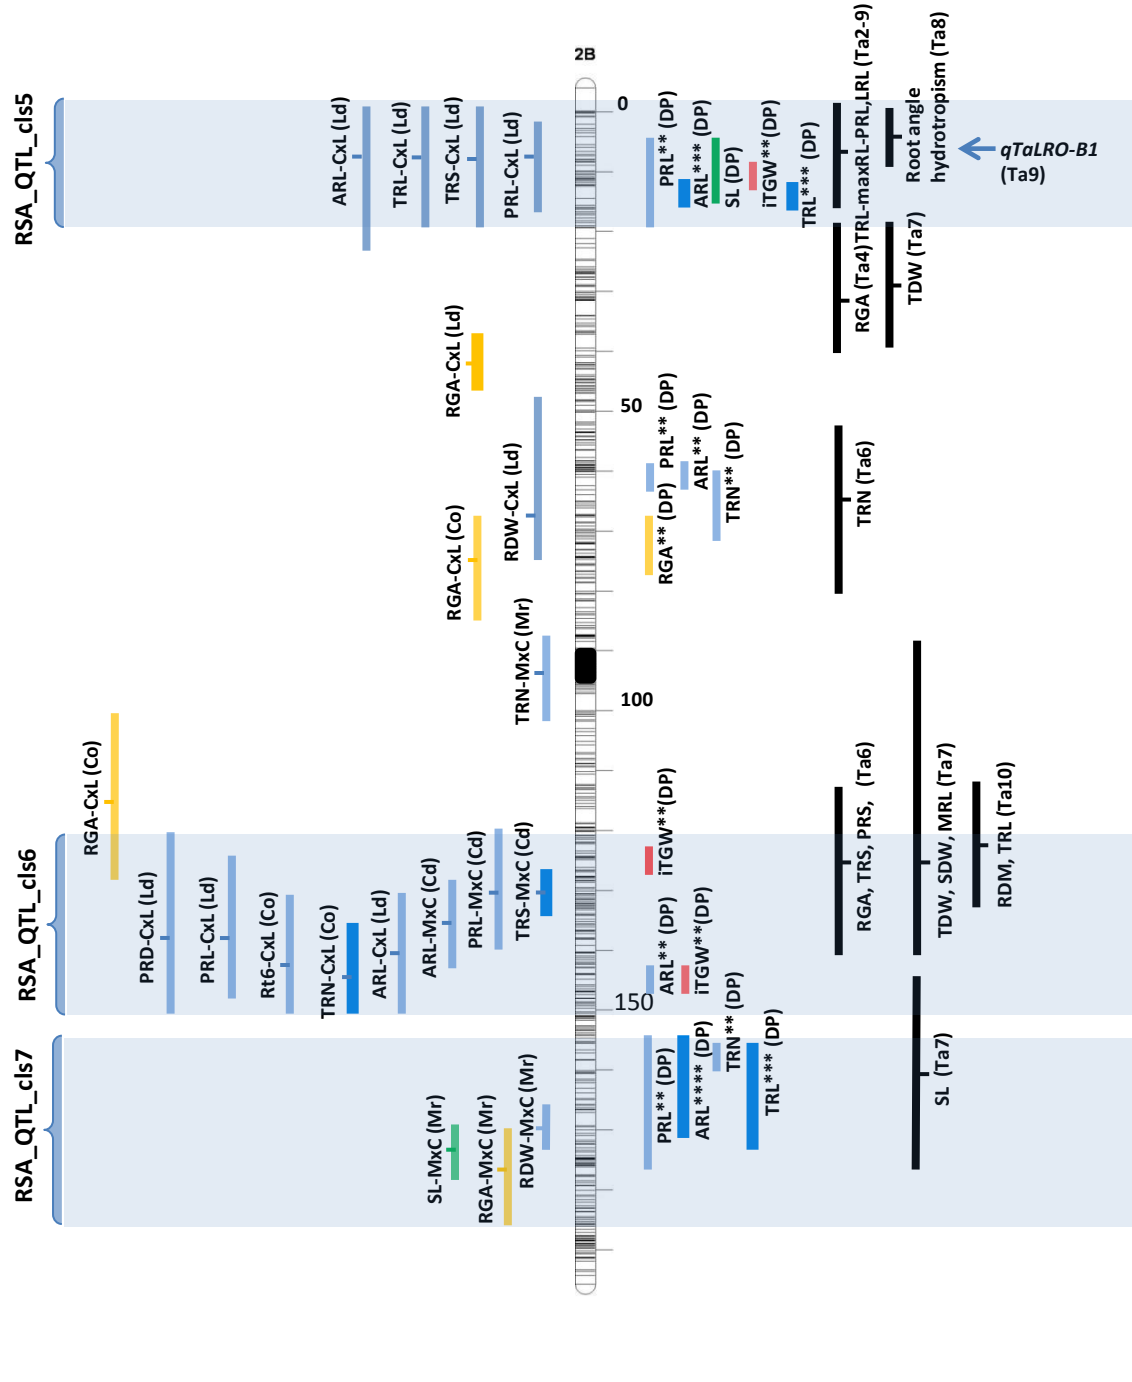



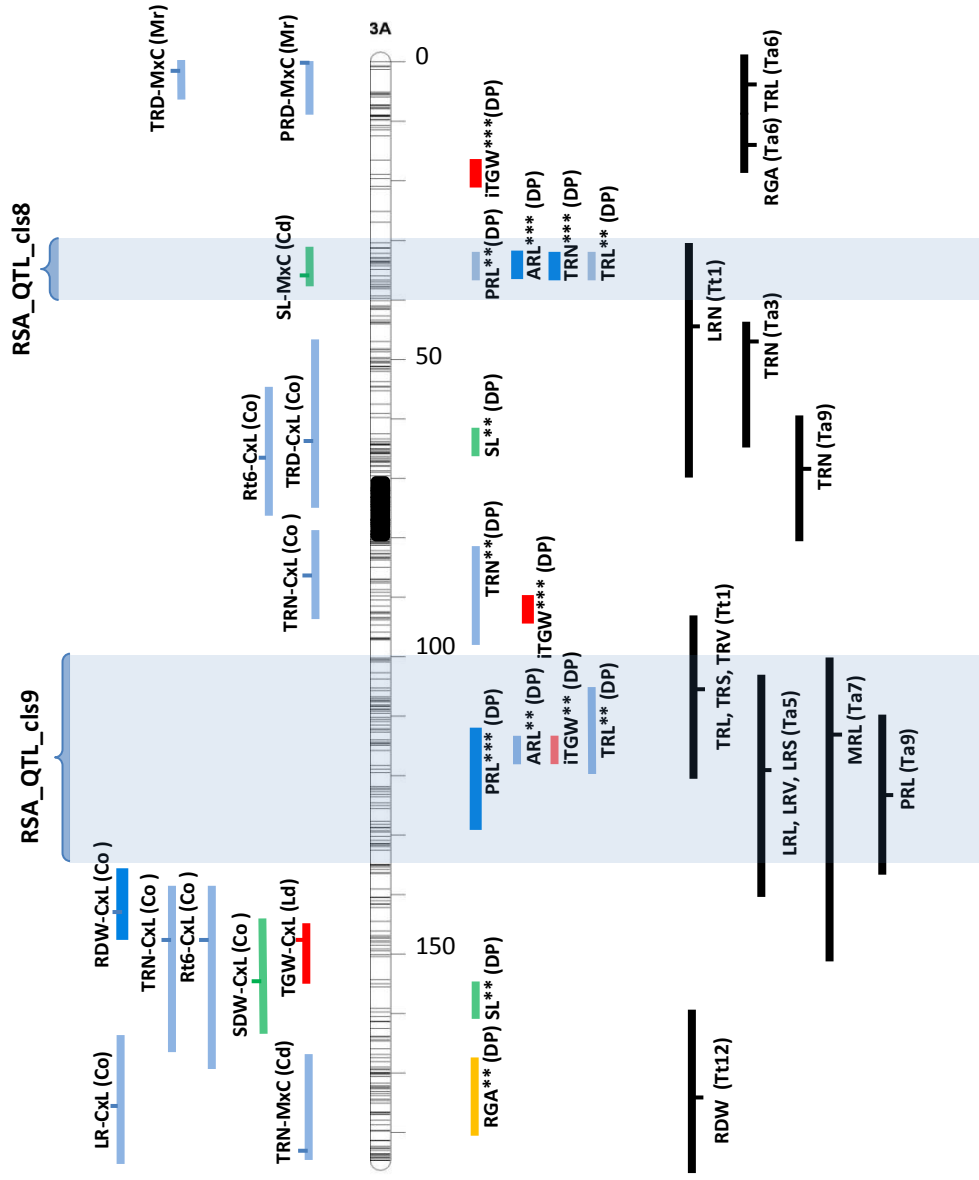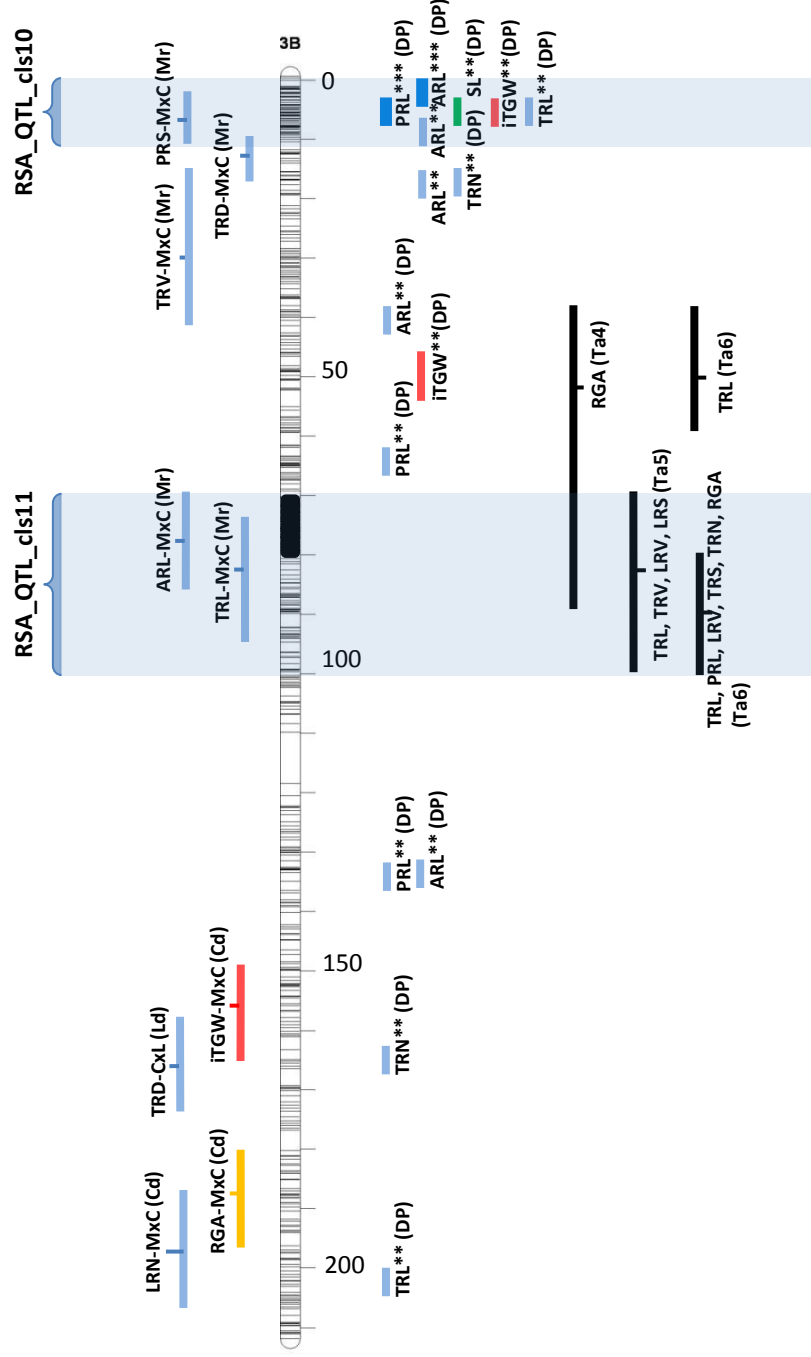

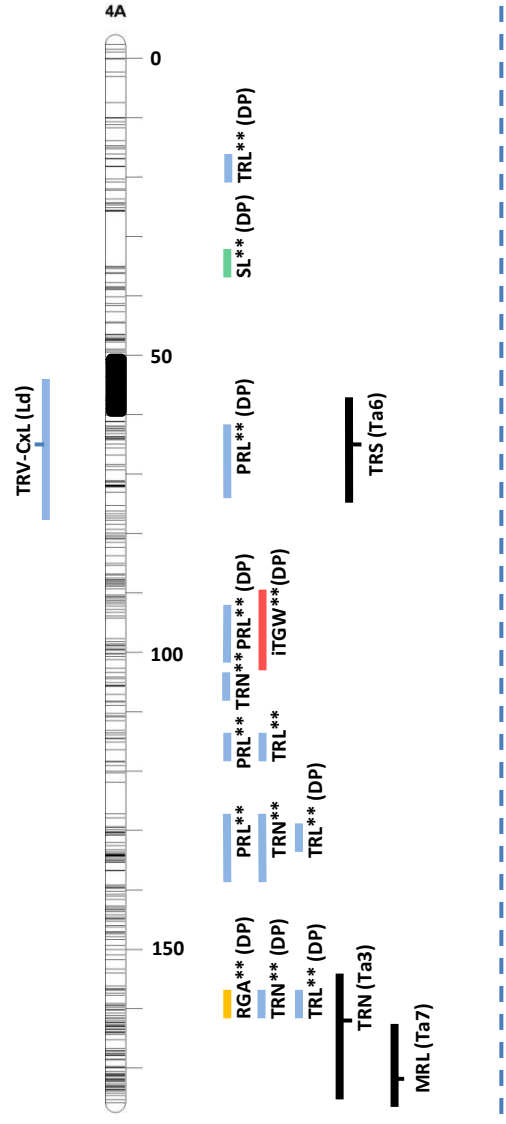

RSA\_QTL\_cls12

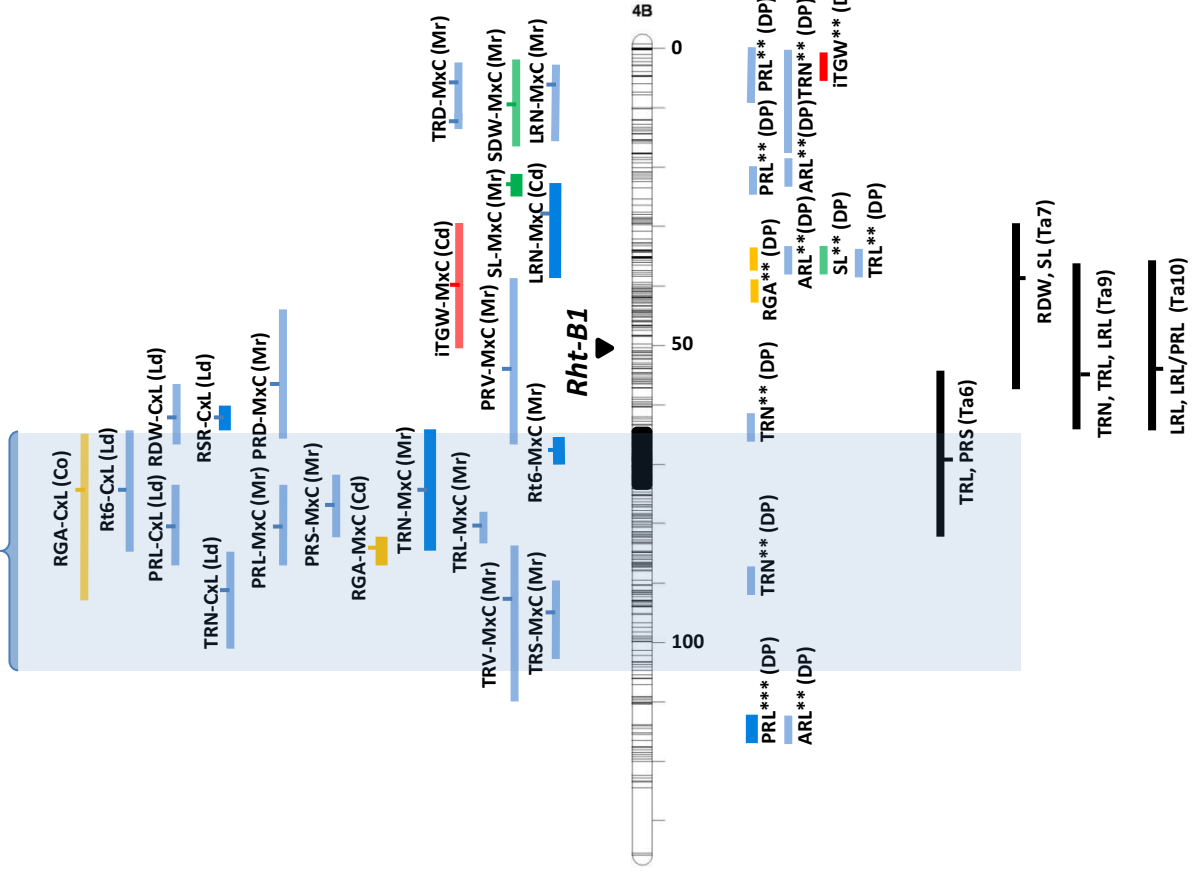

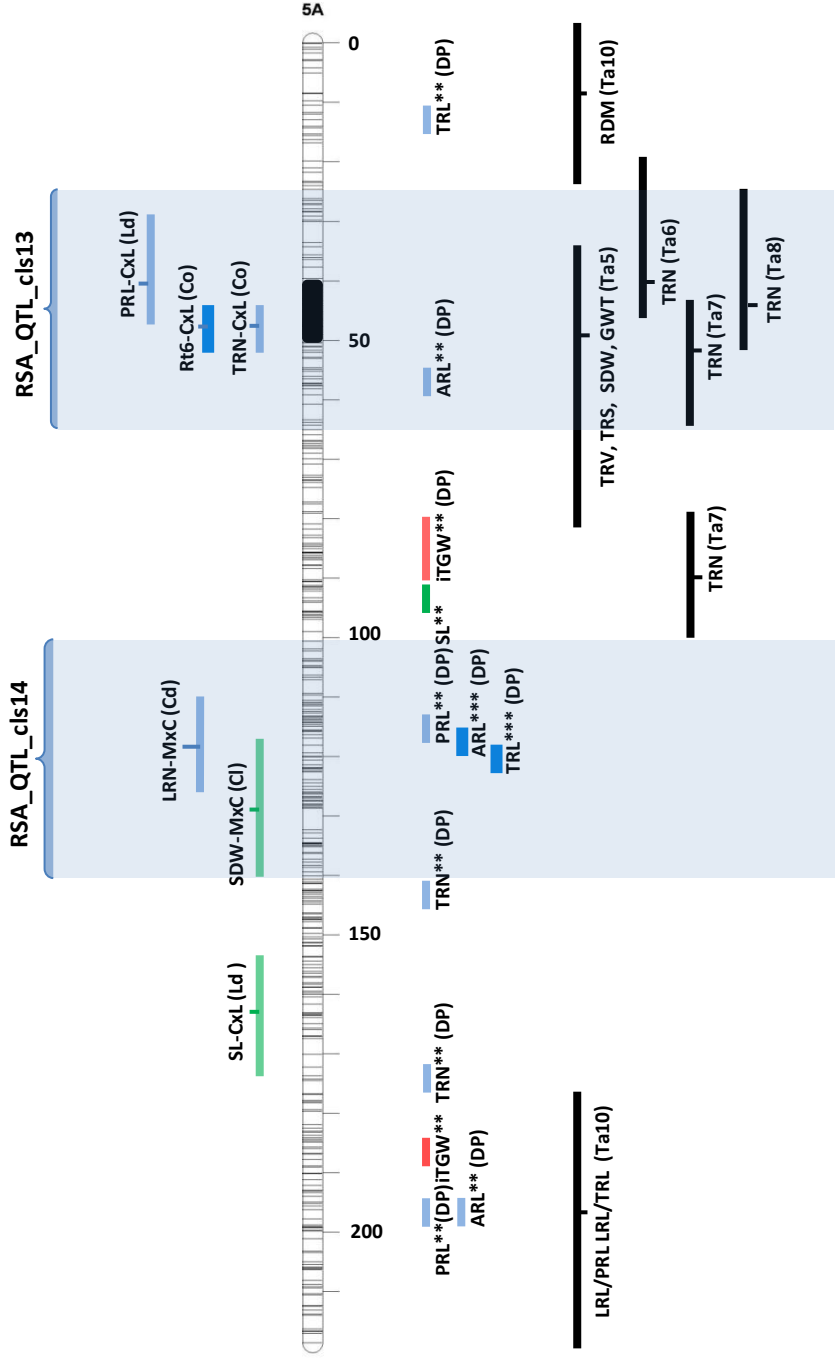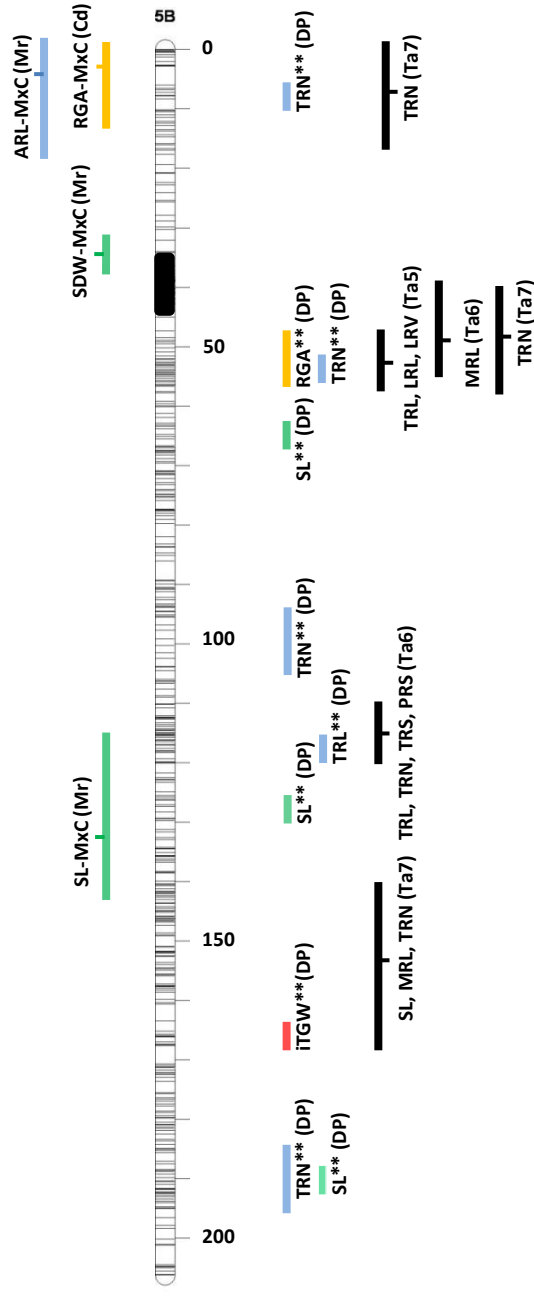

**RSA\_QTL\_cls16**

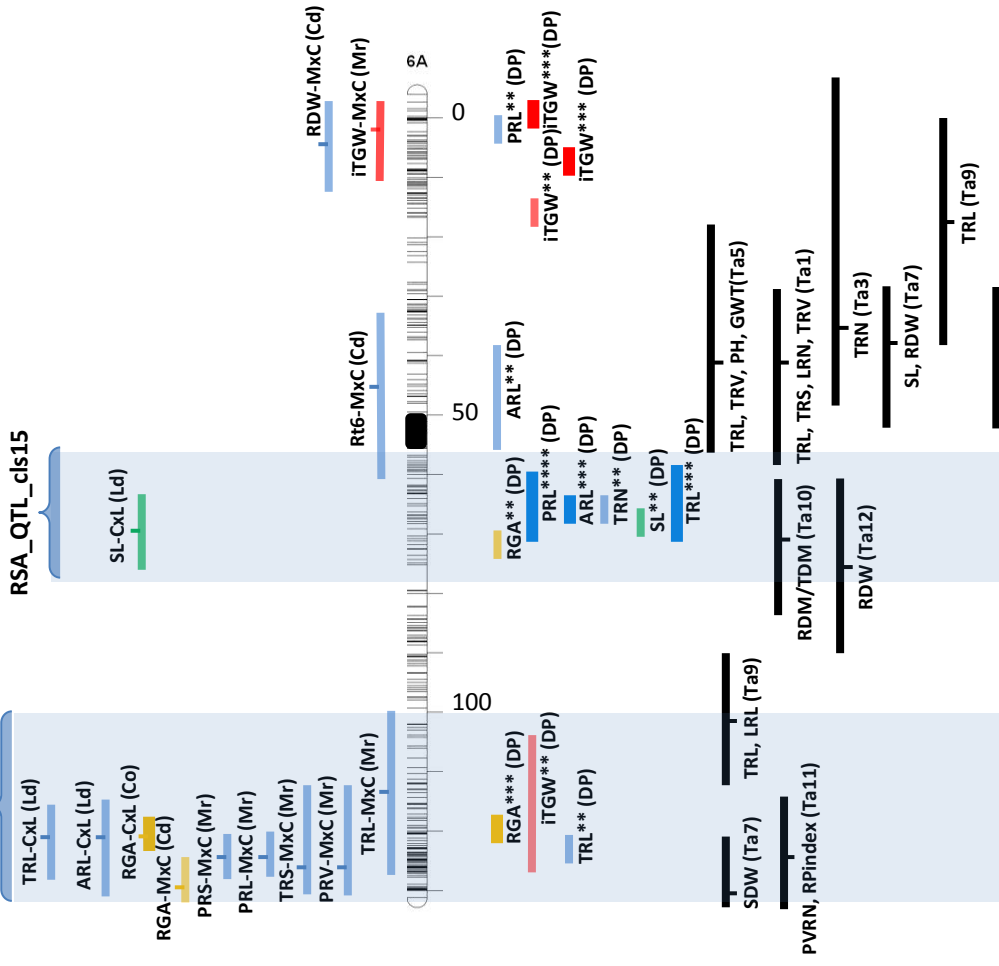

**RSA\_QTL\_cls17**

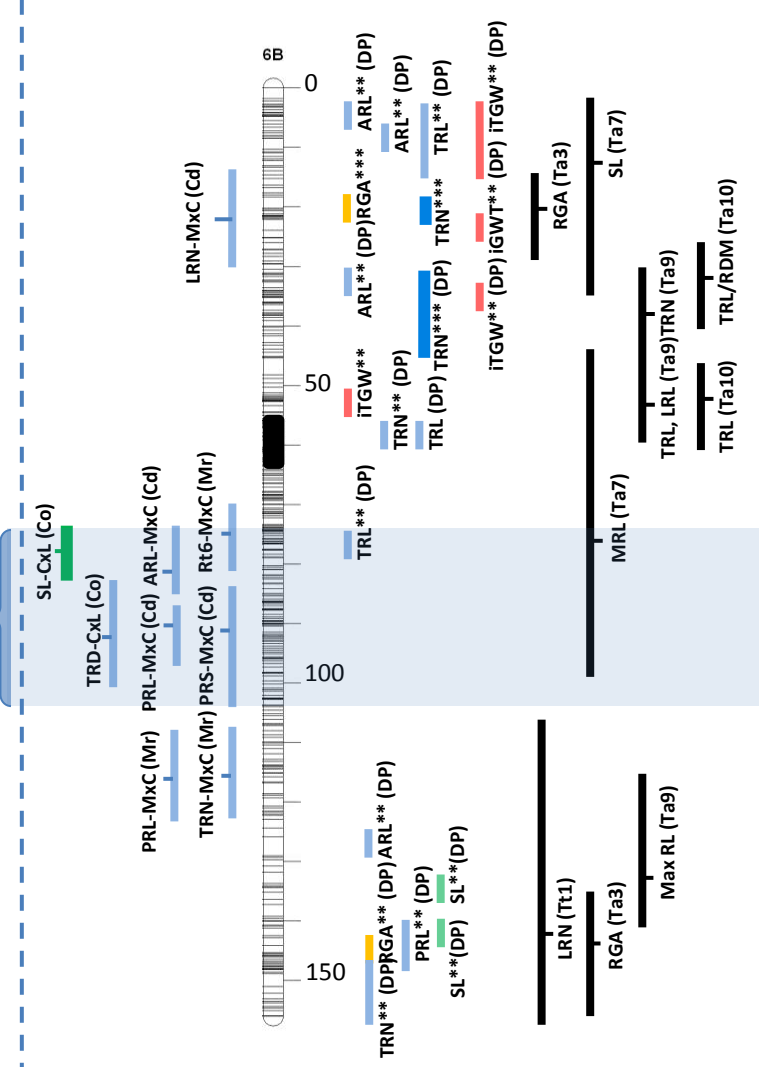

RSA\_QTL\_cis18

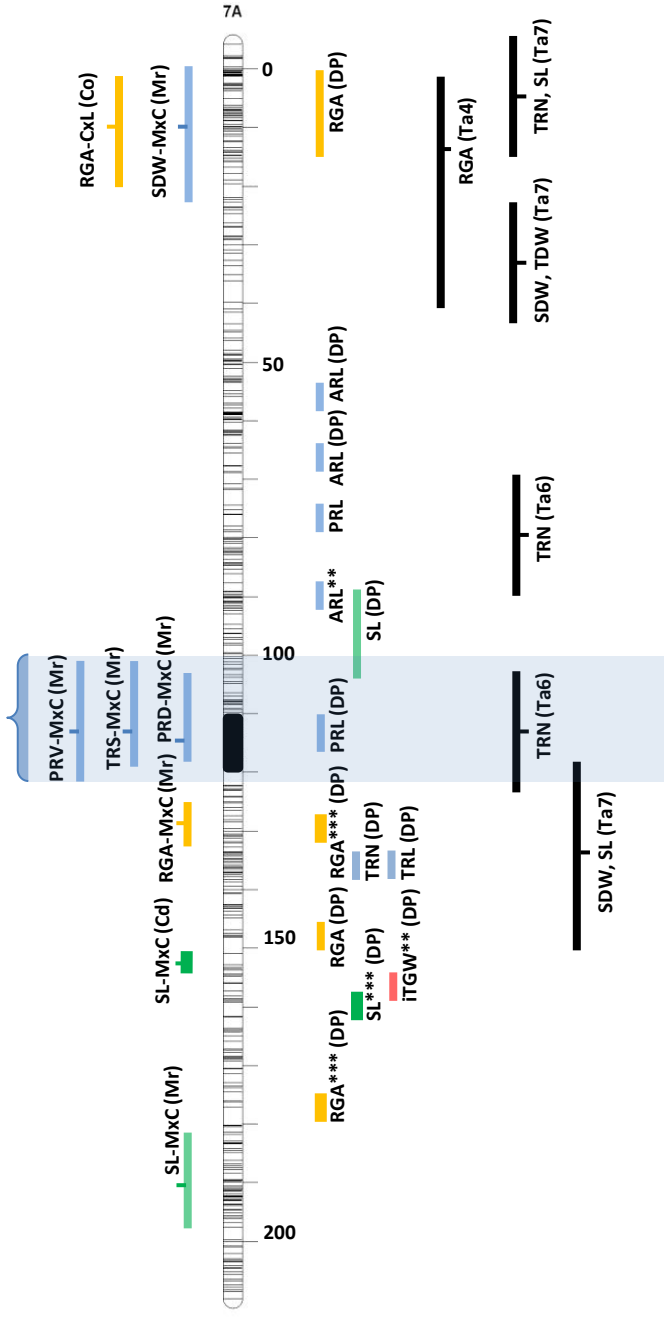

RSA\_QTL\_cis20

TRL-CxL (Co)  
 TRS-CxL (Ld)  
 ARL-CxL (Co)

RSA\_QTL\_cis19

PRS-MxC (Mir)  
 PRL-MxC (Mir)

RGA\*\* (DP)  
 PRL\*\*\* (DP)  
 TRL (Ta6)

RDW, SDW, TDW, MRL (Ta7)

TDW, RDW (Ta7)

RDW (Ta12)

7B

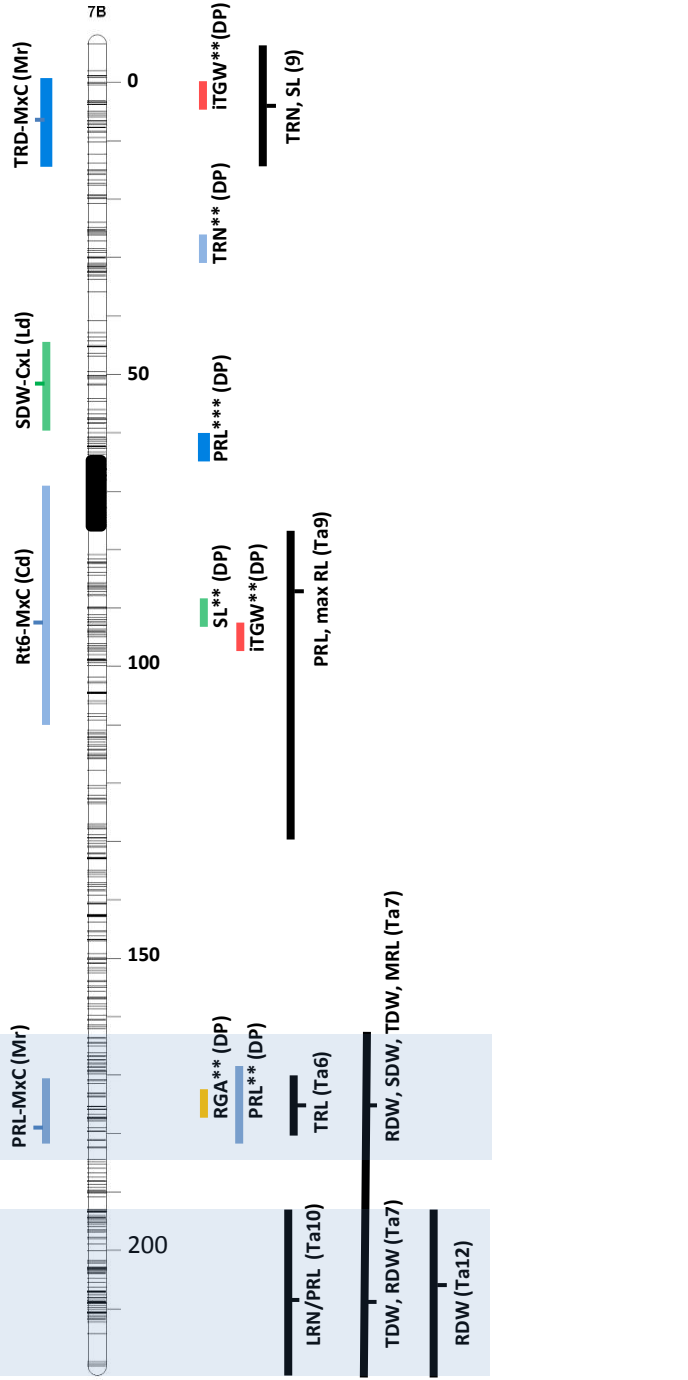

### **Supplementary Figure S3. Schematic representation of root system architecture (RSA) QTLs , grain yield (GY) and thousand grain weight (TKW) in tetraploid wheat projected onto an SNP-based tetraploid consensus map.**

Root system architecture (RSA) QTLs were identified in two durum wheat mapping population and the association mapping panel and RSA QTLs from previously published studies in wheat are projected. The tetraploid wheat consensus map used as a reference has been published by Maccaferri et al. (2015).

**QTLs from Colosseo × Lloyd and Meridiano × Claudio** are reported on the left of chromosome bars while association mapping QTLs (AM-QTLs) are reported on the right. QTLs for root length and number are reported as blue-filled bars, seminal root angle (RGA) QTLs are reported in orange, shoot-related QTLs in green, grain weight (GWT) QTLs in red.

**QTLs from RIL populations** with  $R^2 < 10\%$  are reported as thin half-tone coloured bars, while QTLs with  $R^2 > 10\%$  are reported as tick full-tone bars.

The parental allele with increasing trait effect is reported as round-bracketed using acronyms: **Co**, Colosseo; **Ld**, Lloyd; **Me**, Meridiano; **Cl**, Claudio.

**RSA QTLs from association mapping (Durum Panel, DP)** are reported on the left of chromosome bars together with their significance level: \*\*, marker-wise significance P 0.01; \*\*\*, marker-wise significance, P 0.001; \*\*\*\*, experiment-wise significance, P 0.05

**Grain yield (GY) and grain weight (TKW) QTLs from association mapping (Durum Panel, DP)** are reported on the right of the chromosome bars. GY and TKW QTLs have been searched in the Durum Panel using data from 15 field trials carried out in Mediterranean environments as reported in Maccaferri et al. (2011). Association mapping QTLs have been graphically reported as a plot of QTL density on a 1 cM basis along the chromosomes, based on the QTL significance intervals. According to Maccaferri et al. (2011), QTL density has been reported as a cumulated density plot for: (i) highly stressed low-yielding environments (**red plot**, three environments), (ii) medium yielding, stressed environments (**green plot**, five envs.), (iii) high-yielding environments (**dark violet plot**, seven envs.).

**Major RSA QTL-clusters** based on concomitant co-location of RSA QTL confidence intervals from multiple wheat mapping stocks are reported as grey-banded intervals.

**RSA and field trait acronyms:** TRN, Total root number; R6th, Presence of the 6th asymmetric seminal root; PRL, primary root length; TRL, total root length; ARL, average root length; LRN, lateral root number; RGA, seminal root angle; RDW, root dry weight; SDW, shoot dry weight; SL, shoot length; RSR, root-to-shoot ratio; RS, root surface; RD, root diameter; RV, root volume; GY, grain yield; iGWT, grain weight of seeds used in the RSA experiment; fGWT, grain weight in field trials

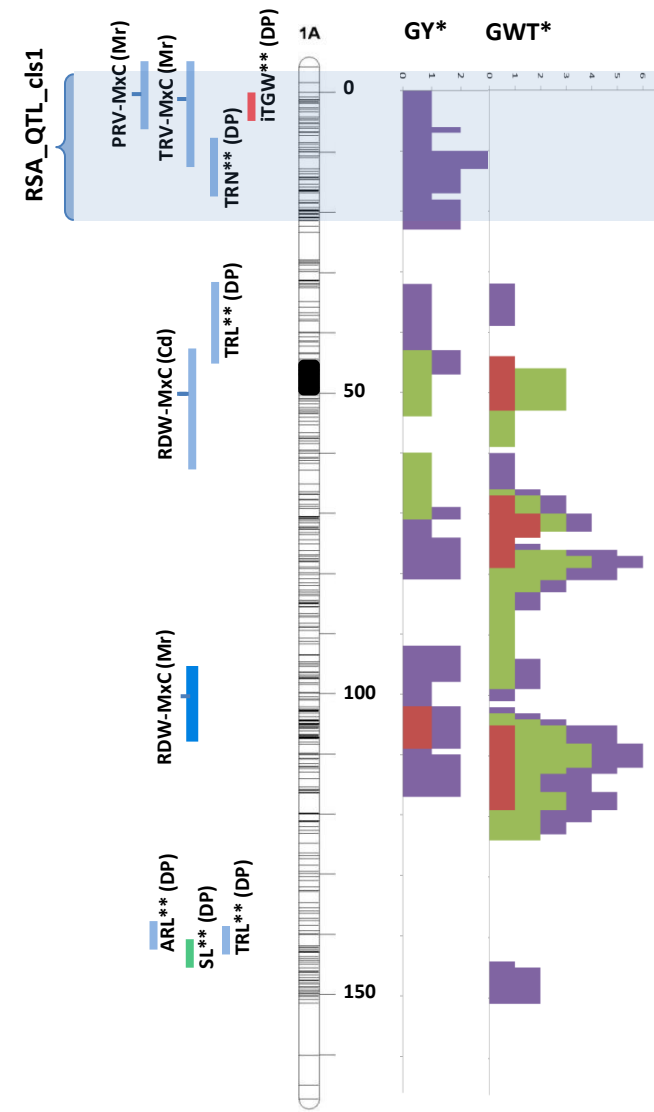

**RSA\_QTL\_cis3 RSA\_QTL\_cis2**

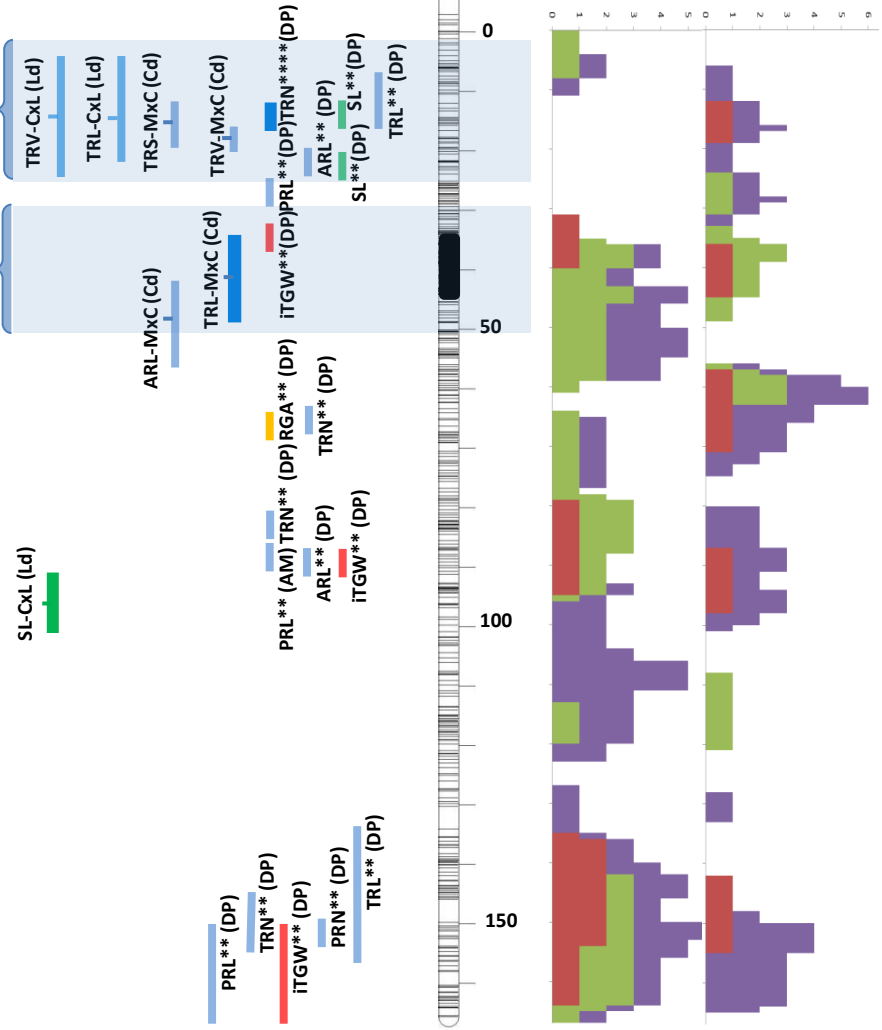

\*: QTL density plot (QTL number over 15 environments in total, plotted on a 1cM basis)

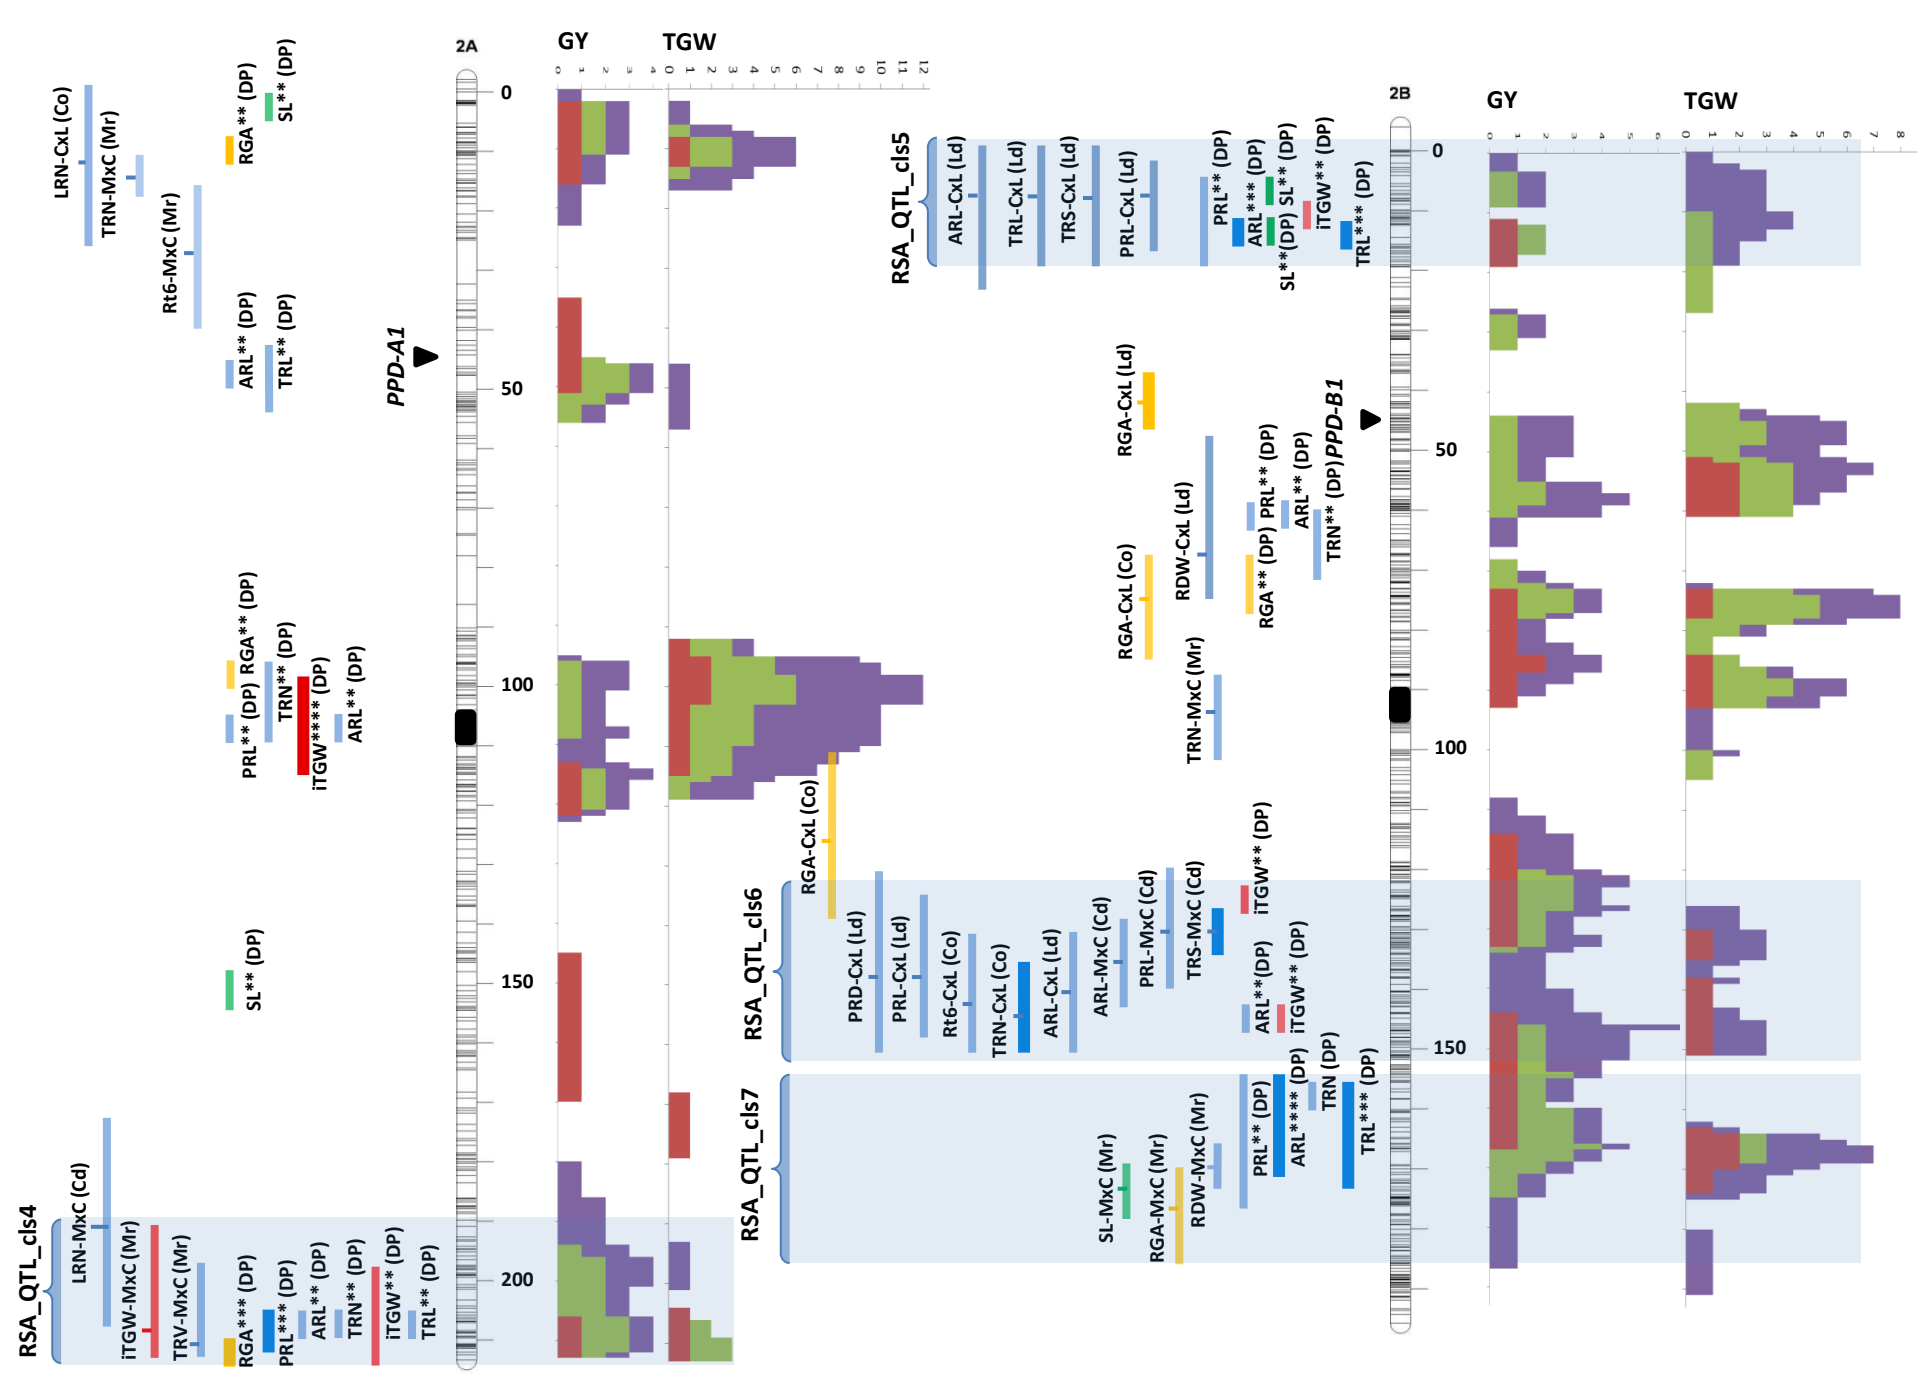



RSA\_QTL\_cis8

RSA\_QTL\_cis9

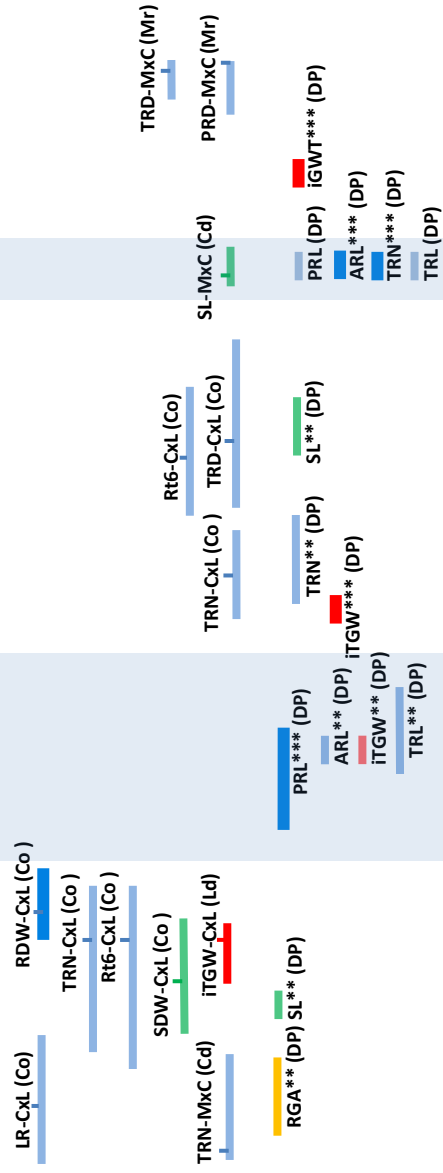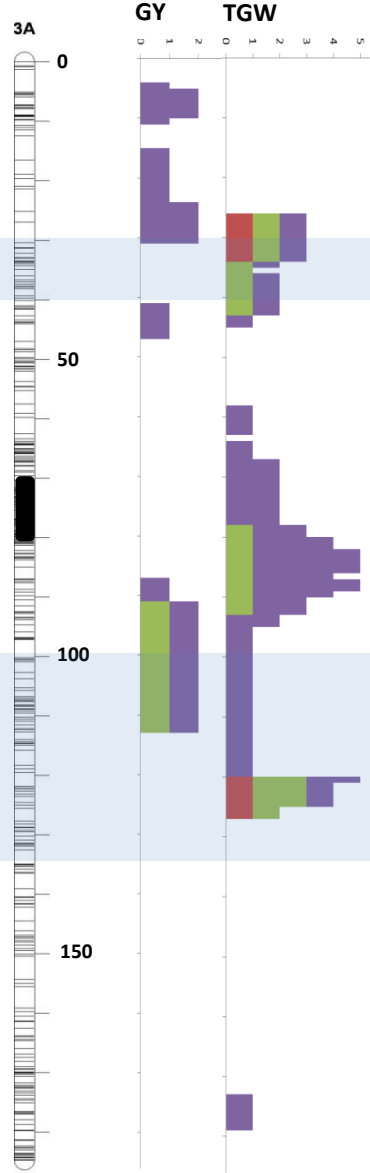

RSA\_QTL\_cis11

RSA\_QTL\_cis10

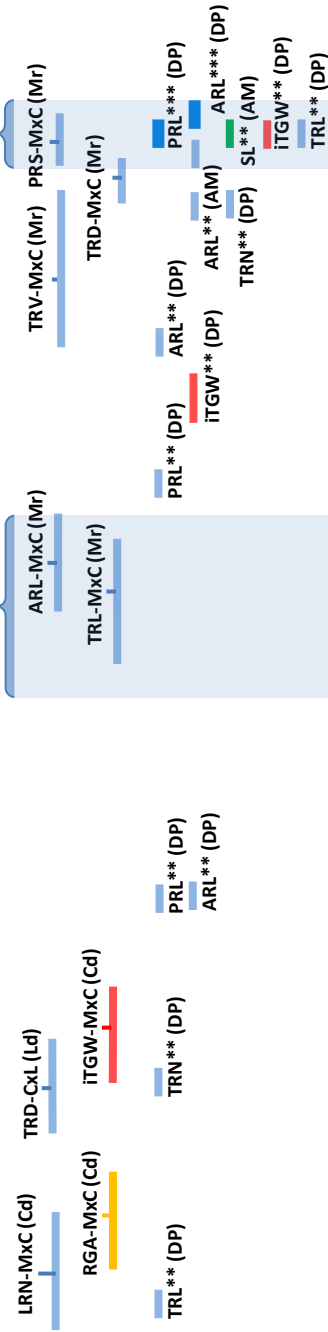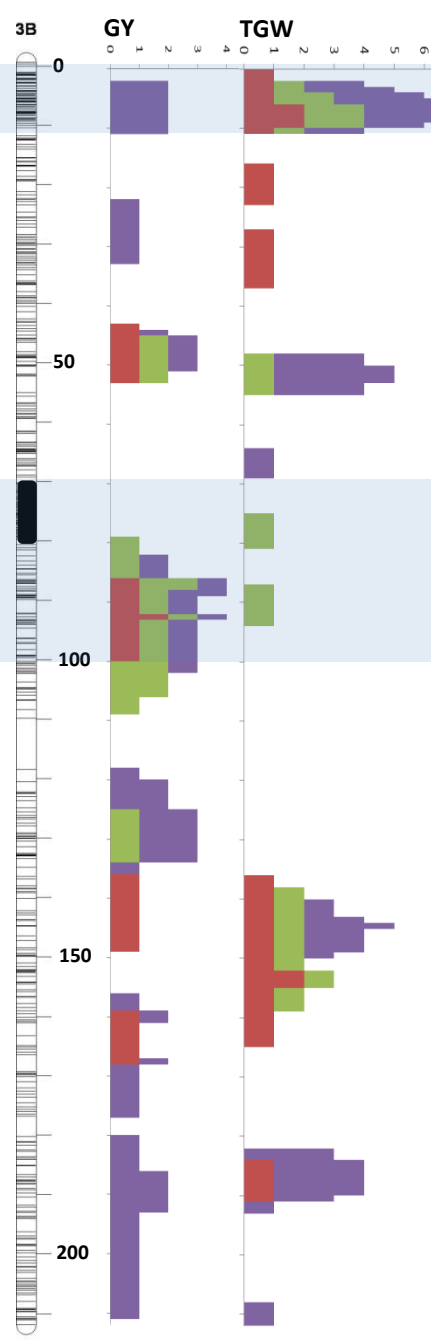

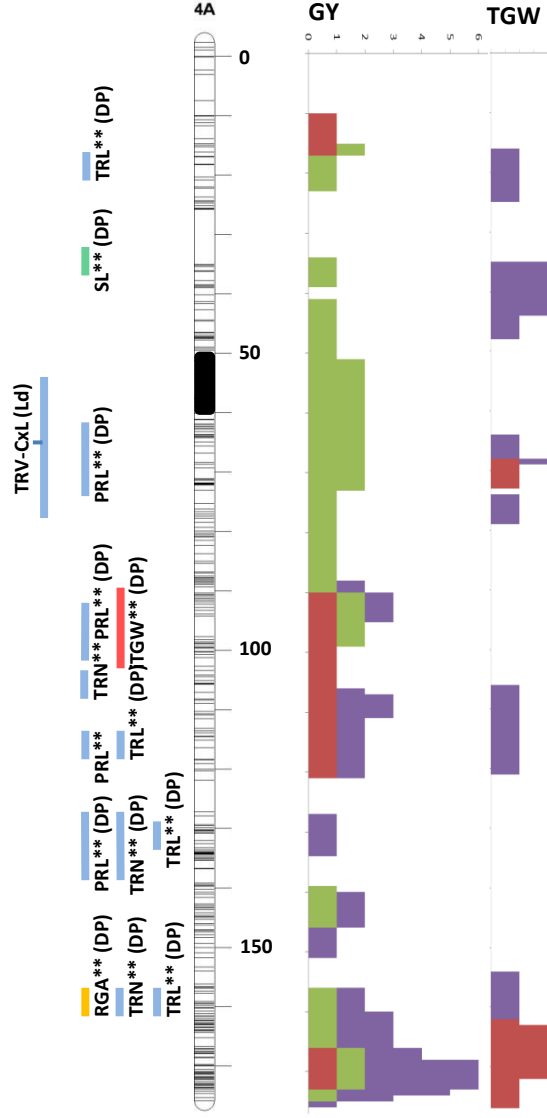

**RSA\_QTL\_cls12**

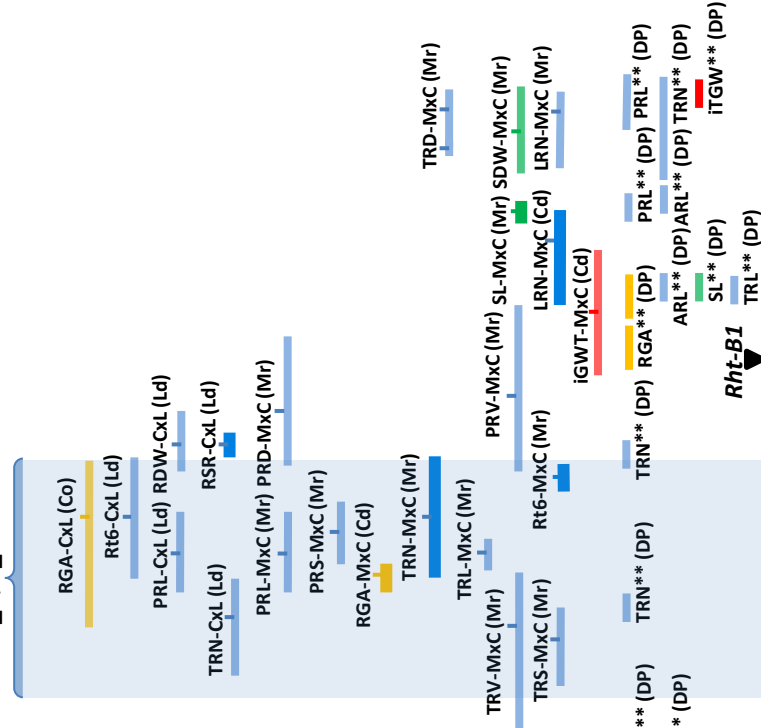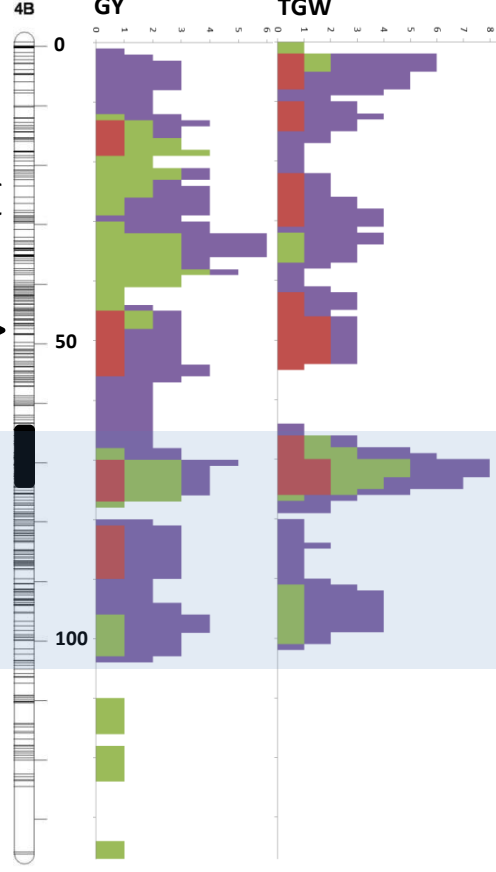

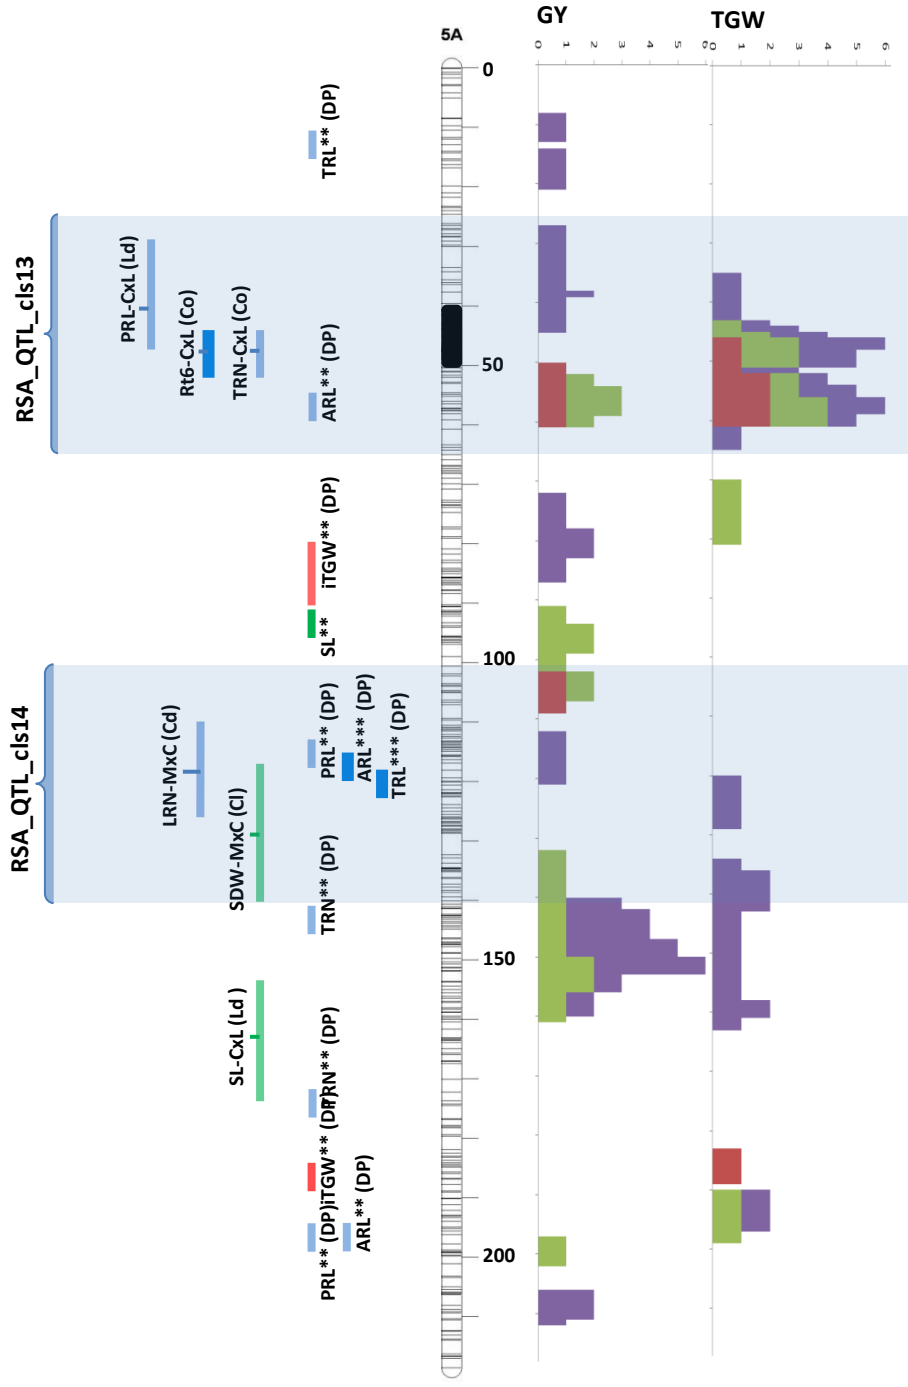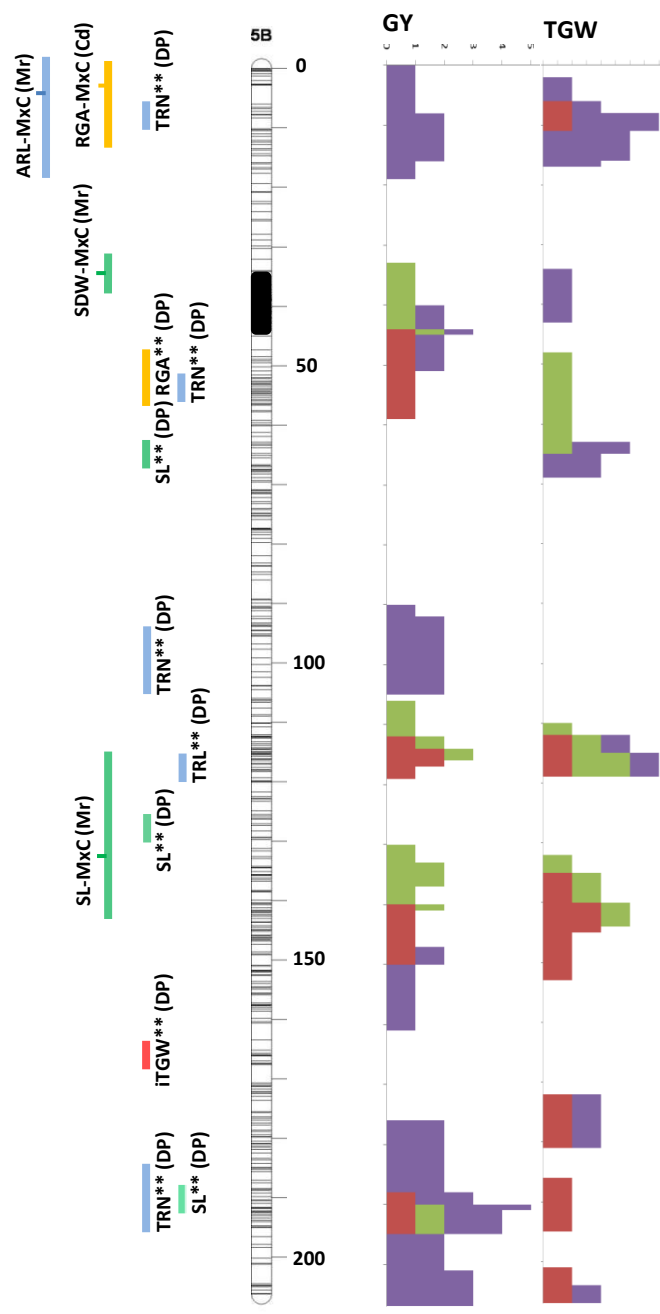

**RSA\_QTL\_cls16**

- TRL-CxL (Ld)
- ARL-CxL (Ld)
- RGA-CxL (Co)
- RGA-MxC (Cd)
- PRS-MxC (Mir)
- PRL-MxC (Mir)
- TRS-MxC (Mir)
- PRV-MxC (Mir)
- TRL-MxC (Mir)

- RGA\*\*\* (DP)
- iTGW\*\* (DP)
- TRL\*\* (DP)

**RSA\_QTL\_cls15**

- SL-CxL (Ld)
- Rt6-MxC (Cd)

- RGA\*\* (DP)
- PRL\*\*\*\* (DP)
- ARL\*\*\* (DP)
- TRN (DP)
- SL (DP)
- TRL\*\*\* (DP)

- ARL\*\* (DP)
- iTGW\*\* (DP)
- iTGW\*\*\*\* (DP)
- iTGW\*\*\* (DP)

- RDW-MxC (Cd)
- iGWT-MxC (Mir)

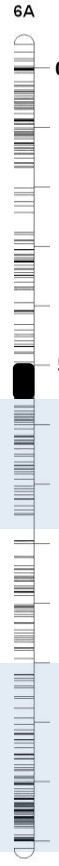

**GY**

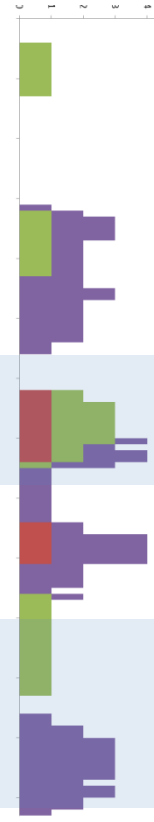

**TGW**

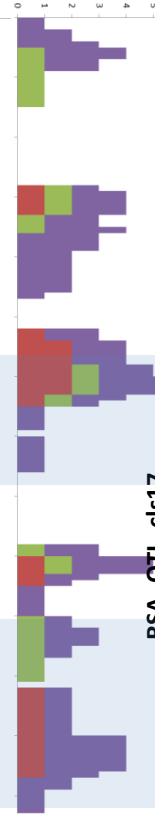

**RSA\_QTL\_cls17**

- SL-CxL (Co)

- TRD-CxL (Co)
- PRL-MxC (Mir)
- TRN-MxC (Mir)
- PRL-MxC (Cd)
- PRV-MxC (Cd)
- PRS-MxC (Cd)
- Rt6-MxC (Mir)
- ARL-MxC (Cd)
- LRN-MxC (Cd)

- TRN\*\* (DP)
- RGA\*\* (DP)
- ARL\*\* (DP)
- PRL\*\* (DP)
- SL\*\* (DP)

- ARL\*\* (DP)
- TRN\*\* (DP)
- TRL\*\* (DP)
- TRN\*\*\*\* (DP)
- TRL\*\*\* (DP)
- TRL\*\* (DP)
- iTGW\*\* (DP)
- iTGW\*\*\*\* (DP)

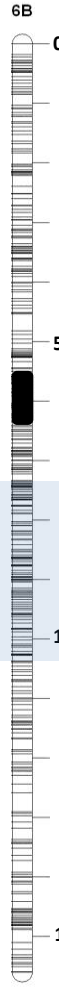

**GY**

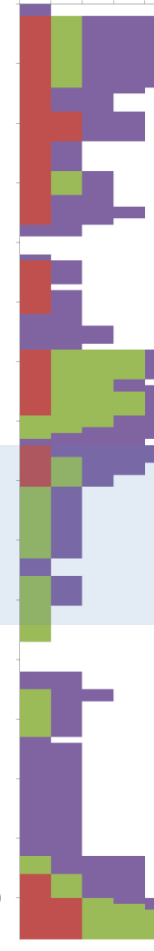

**TGW**

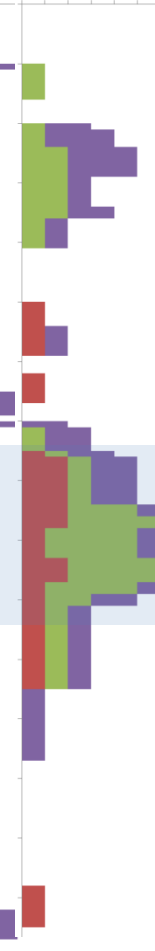

### RSA\_QTL\_cls18

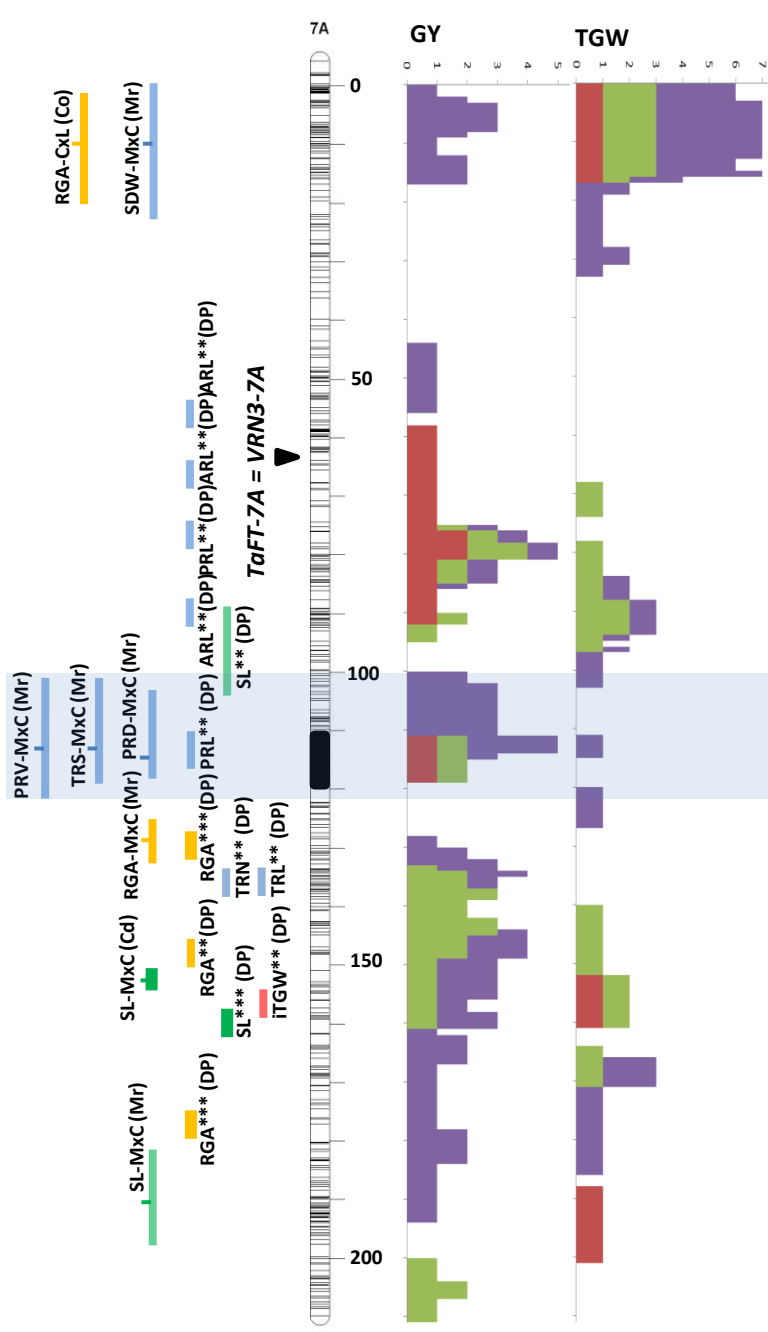

### RSA\_QTL\_cls19

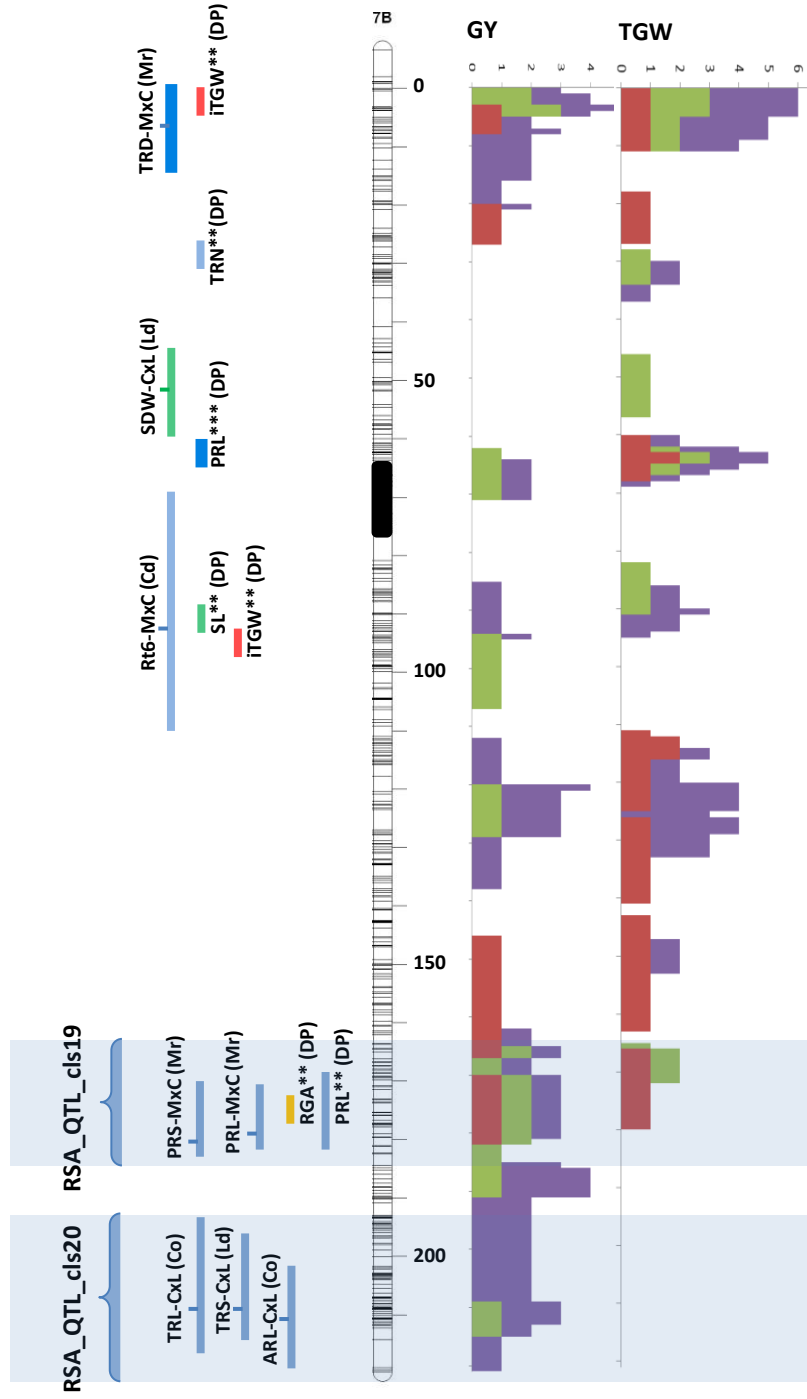

### RSA\_QTL\_cls20



**Supplementary Figure S4. Schematic ideotypes of wheat plants with shallow and deep root system architecture consequent to different seminal root growth angle (RGA) QTLs which can potentially contribute towards these ideotypes through marker-assisted selection.**

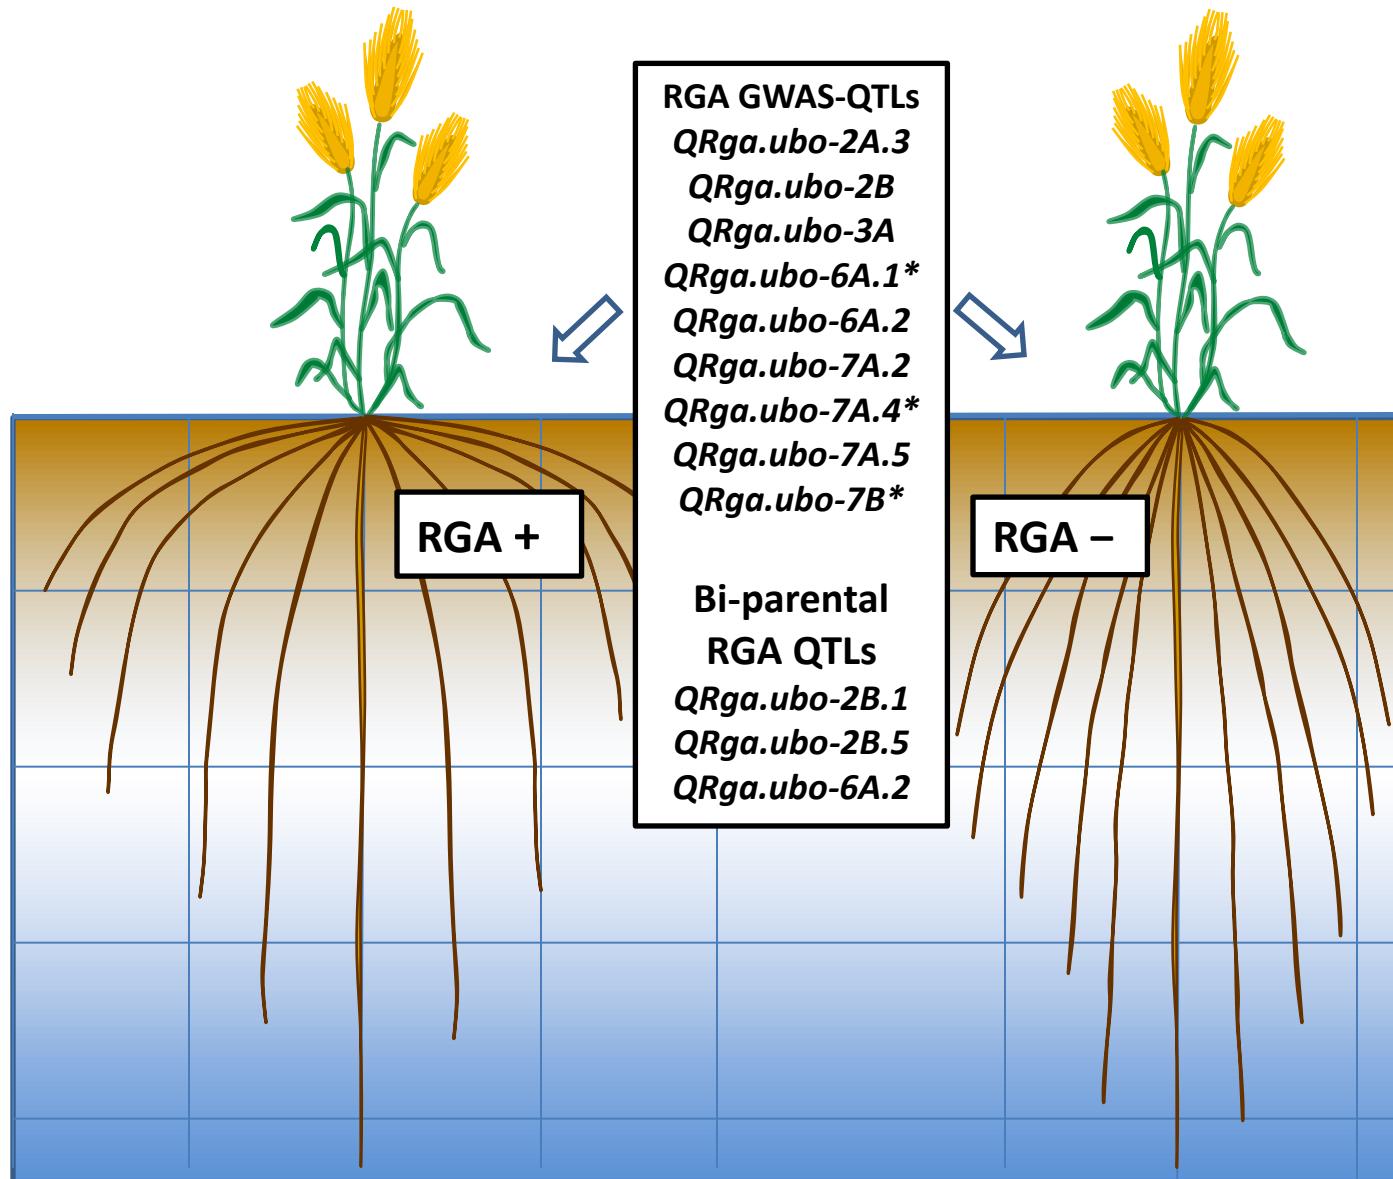

\* QTL effect consistently associated to GY across the majority of 15 Mediterranean environments (see Suppl. Table 7)
